1 Spatiotemporal sequence of mesoderm and endoderm lineage  
2 segregation during mouse gastrulation

3

4 Simone Probst<sup>1,5,\*</sup>, Sagar<sup>2</sup>, Jelena Tomic<sup>1,3,4</sup>, Carsten Schwan<sup>1</sup>, Dominic Grün<sup>2,5</sup>,  
5 Sebastian J. Arnold<sup>1,5,\*</sup>

6

7 <sup>1</sup>Institute of Experimental and Clinical Pharmacology and Toxicology, Faculty of Medicine, University of Freiburg,  
8 Albertstrasse 25, D-79104 Freiburg, Germany

9 <sup>2</sup>Max Planck Institute of Immunobiology and Epigenetics, Stübeweg 51, D-79108 Freiburg, Germany

10 <sup>3</sup>Spemann Graduate School of Biology and Medicine (SGBM), University of Freiburg, Albertstrasse 19a, D-79104  
11 Freiburg, Germany

12 <sup>4</sup>Faculty of Biology, University of Freiburg, Schänzlestrasse 1, D-79104 Freiburg, Germany

13 <sup>5</sup>Signaling Research Centers BIOSSE and CIBSS, University of Freiburg, Schänzlestrasse 18, D-79104 Freiburg,  
14 Germany

15 \* Correspondence: [simone.probst@uniklinik-freiburg.de](mailto:simone.probst@uniklinik-freiburg.de), [sebastian.arnold@pharmakol.uni-freiburg.de](mailto:sebastian.arnold@pharmakol.uni-freiburg.de)

16

17 **Running title**

18 Mesoderm vs. endoderm segregation

19

20 **Keywords**

21 Gastrulation, mouse embryo, *Eomes*, definitive endoderm, mesoderm, lineage  
22 specification

23

24 **Summary statement**

25 Cells lineages are specified in the mouse embryo already within the primitive streak  
26 where *Mesp1*+ mesoderm and *Foxa2*+ endoderm are generated in a spatial and  
27 temporal sequence from unbiased progenitors.

28

29 **Abstract**

30 Anterior mesoderm (AM) and definitive endoderm (DE) progenitors represent the  
31 earliest embryonic cell types that are specified during germ layer formation at the  
32 primitive streak (PS) of the mouse embryo. Genetic experiments indicate that both  
33 lineages segregate from *Eomes* expressing progenitors in response to different  
34 NODAL signaling levels. However, the precise spatiotemporal pattern of the  
35 emergence of these cell types and molecular details of lineage segregation remain  
36 unexplored. We combined genetic fate labeling and imaging approaches with scRNA-  
37 seq to follow the transcriptional identities and define lineage trajectories of *Eomes*  
38 dependent cell types. All cells moving through the PS during the first day of  
39 gastrulation express *Eomes*. AM and DE specification occurs before cells leave the  
40 PS from discrete progenitor populations that are generated in distinct spatiotemporal  
41 patterns. Importantly, we don't find evidence for the existence of progenitors that co-  
42 express markers of both cell lineages suggesting an immediate and complete  
43 separation of AM and DE lineages.

44

## 45 **Introduction**

46 During mammalian gastrulation the pluripotent cells of the epiblast become lineage  
47 specified and form the three primary germ layers definitive endoderm (DE), mesoderm  
48 and (neuro-) ectoderm. Mesoderm and DE are generated at the posterior side of the  
49 embryo under the influence of elevated levels of the instructive signals of  
50 TGF $\beta$ /NODAL, WNT and FGF. These signals induce an epithelial-to-mesenchymal  
51 transition (EMT) of epiblast cells at the primitive streak (PS) leading to their  
52 delamination and the formation of the mesoderm and DE cell layer. The nascent  
53 mesoderm layer rapidly extends towards the anterior embryonic pole by cell migration  
54 between the epiblast and the visceral endoderm (VE) (reviewed by (Arnold and  
55 Robertson 2009; Rivera-Pérez et al. 2003)). DE progenitors migrate from the epiblast  
56 together with mesoderm cells, before they eventually egress into the VE layer to  
57 constitute the DE (reviewed by (Rivera-Pérez and Hadjantonakis 2014; Viotti et al.  
58 2014)).

59 Current concepts suggest that different cell fates are specified according to the time  
60 and position of cell ingress through the PS reflecting different instructive signaling  
61 environments (Rivera-Pérez and Hadjantonakis 2014). However, the precise  
62 morphogenetic mechanisms guiding the emergence of various cell types along the  
63 PS still remain uncertain. This is at least in parts due to the lack of detailed knowledge  
64 about the precise timing and location of individual cells becoming lineage specified,  
65 and the challenge to exactly determine the signaling pathway activities during fate  
66 commitment.

67 Clonal cell labeling and transplantation experiments have proposed the gross patterns  
68 and dynamics of cell specification during gastrulation, which have been represented  
69 in fate maps of the epiblast and the early germ layers (Tam and Behringer 1997;  
70 Lawson 1999). Accordingly, first mesoderm cells delaminate from the newly formed  
71 PS at the proximal posterior pole of the embryo and give rise to extraembryonic  
72 mesoderm cells (ExM). These migrate proximally and anteriorly to contribute to the  
73 mesodermal components of the amnion, chorion, and the yolk sac (Parameswaran  
74 and Tam 1995; Kinder et al. 1999). Embryonic anterior mesoderm (AM) giving rise to  
75 cardiac and cranial mesoderm follows shortly after ExM (Kinder et al. 1999). As the  
76 PS elongates towards the distal embryonic pole other mesoderm subtypes and DE  
77 are generated. The distal domain of the PS (referred to as anterior PS, APS) generates

78 DE and axial mesoderm progenitors, giving rise to the node, notochord and  
79 prechordal plate mesoderm (Kinder et al. 2001; Lawson et al. 1991). Additional  
80 mesoderm subtypes, such as lateral plate, paraxial and intermediate mesoderm are  
81 generated between the APS and the proximal PS (Lawson et al. 1991; Kinder et al.  
82 1999; Tam et al. 1997; Parameswaran and Tam 1995).

83 TGF $\beta$ /NODAL and WNT signals are indispensable for gastrulation onset (Brennan et  
84 al. 2001; Conlon et al. 1994; Liu et al. 1999) and genetic experiments revealed that  
85 graded levels of NODAL and WNT signaling instruct distinct lineage identities during  
86 gastrulation (Vincent et al. 2003, Dunn et al., 2004; reviewed by (Robertson 2014;  
87 Arkell et al. 2013)). The T-box transcription factor *Eomes* is a transcriptional target of  
88 NODAL/SMAD2/3 signaling (Brennan et al. 2001; Teo et al. 2011; Kartikasari et al.  
89 2013) and is crucial for the specification of all DE and AM progenitors ( (Arnold et al.  
90 2008; Costello et al. 2011; Probst and Arnold 2017)). Another T-box transcription  
91 factor, *Brachyury* (T) is essential for the formation of posterior mesoderm starting from  
92 E7.5. Thus, the specification of all types of mesoderm and endoderm (ME) relies on  
93 either of the two T-box factors *Eomes* or *Brachyury* (Tosic et al. 2019). Experiments  
94 using differentiating human embryonic stem cells showed that EOMES directly binds  
95 and regulates the expression of DE genes together with SMAD2/3 (Teo et al. 2011).  
96 Similarly in the mouse embryo DE specification relies on high NODAL/SMAD2/3  
97 signaling levels (Dunn et al. 2004; Vincent et al. 2003). In contrast, in the presence of  
98 low or even absent NODAL/SMAD2/3 signals, EOMES activates transcription of key  
99 determinants for anterior mesoderm, including *Mesp1* (Saga et al. 1999; Lescroart et  
100 al. 2014; Kitajima et al. 2000; Costello et al. 2011; van den Aemele et al. 2012).

101 Recently single cell RNA sequencing (scRNA-seq) analyses allowed for a more  
102 detailed view on the cellular composition of embryos during gastrulation stages  
103 including the identification of previously unknown rare and transient cell types  
104 (Scialdone et al. 2016; Mohammed et al. 2017; Wen et al. 2017; Lescroart et al. 2018;  
105 Pijuan-Sala et al. 2019). Despite the insights into the molecular mechanisms of cell  
106 lineage specification, questions about the emergence of the two *Eomes* dependent  
107 cell lineages, AM and DE, remain unresolved. It is still unclear if both cell populations  
108 are generated simultaneously from a common progenitor, and when and where  
109 lineage separation occurs. Answers to these questions are required for a  
110 comprehensive view on how suggested differences in the signaling environment

111 impact on lineage specification of mesoderm and DE identities that are generated in  
112 close proximity within the epiblast of early gastrulation stage embryos that consist of  
113 only a few hundred cells (Snow 1977).

114 In this study we used embryo imaging and genetic fate mapping approaches by novel  
115 reporter alleles in combination with molecular characterization by scRNA-seq to  
116 delineate the spatiotemporal patterns of *Eomes* dependent lineage specification. We  
117 show that AM and DE progenitors segregate already within the PS into distinct cell  
118 lineages. AM progenitors leave the PS earlier and at more proximal regions than DE,  
119 demonstrating a clear spatial and temporal separation of lineage specification. The  
120 analysis of scRNA-seq experiments suggest that AM and DE progenitors are  
121 immediately fate segregated and *Eomes* positive progenitors that co-expresses DE  
122 and AM markers were not found. This suggests that bipotential *Eomes* positive  
123 progenitors rapidly progress into either AM or DE lineage specified cell types  
124 preceding cell ingression at the PS.

125

## 126 Results

### 127 ***Eomes* marks all cells leaving the PS during the first day of gastrulation**

128 We used our previously described *Eomes*<sup>mTnG</sup> fluorescent reporter allele to observe  
129 the emergence of *Eomes* dependent cell lineages during gastrulation. This reporter  
130 allele labels *Eomes* positive cells with membrane bound Tomato (mT) and nuclear  
131 GFP (nG) ((Probst et al. 2017) and Fig. 1A-F). Embryos at stages shortly preceding  
132 gastrulation onset (E6.25) show labeling within the cells of the posterior epiblast  
133 before cells leave the PS (Fig. 1A). *Eomes* positive cells are also detected in the VE  
134 where it has functions in AVE induction (Nowotschin et al. 2013). Reporter expression  
135 in the epiblast persists until E7.5 marking the prospective cells of the AM and DE (Fig.  
136 1B-D). Importantly, all cells leaving the PS are EOMES positive during these early  
137 gastrulation stages suggesting a general requirement of *Eomes* for the specification  
138 of early lineages (Fig. 1B-E, G, H). Accordingly, the maximum intensity projection (MIP)  
139 of z-stacks at E7.5 shows that the endoderm layer, that at this stage mainly consists  
140 of DE cells, is composed of *Eomes* reporter positive cells (Fig. 1F). In the endoderm  
141 layer a few reporter negative cells can be detected, which most likely represent VE  
142 cells, that loose reporter expression at around E7.25 (Fig. 1C, F). Since the fluorescent  
143 reporter proteins are more stable than the endogenous protein (Probst et al. 2017),  
144 we additionally performed immunofluorescence (IF) staining for EOMES at E7.25 and  
145 E7.5, showing the presence of EOMES protein in the cells of the posterior epiblast  
146 and in cells of the mesoderm and endoderm layers (Fig. 1G, H). *Eomes* mRNA  
147 expression is rapidly downregulated at E7.5 (Ciruna and Rossant 1999), and EOMES  
148 protein is undetectable about 12 hours later (Probst et al. 2017). In conclusion,  
149 mesoderm and endoderm progenitors generated during the first day of gastrulation  
150 from E6.5 to E7.5 are exclusively descendants of *Eomes* expressing cells (Fig. 1P).  
151 These constitute the progenitors of AM and DE as previously shown by *Eomes*<sup>Cre</sup>-  
152 mediated fate-labeling (Costello et al. 2011). This suggests that other mesodermal  
153 lineages, which are *Eomes* independent, leave the PS at later timepoints after the  
154 downregulation of *Eomes* expression in the PS.

155 To molecularly characterize the *Eomes* dependent cell types during early gastrulation  
156 we performed scRNA-seq of cells collected from E6.75 and E7.5 embryos (Fig. 1I-O).  
157 289 handpicked cells from 14 E6.75 embryos and 371 cells isolated by FACS from  
158 E7.5 pooled litters were included in the scRNA-seq analysis. To find transient

159 progenitor populations within the epiblast we clustered the cells using RaceID3  
160 (Herman et al. 2018), an algorithm specifically developed for the identification of rare  
161 cell types within scRNA-seq data (Grün et al. 2015). This analysis defined seven  
162 different cell clusters at E6.75 and 18 clusters at E7.5 (Fig. S1A, B).

163 The tissue identities of clusters were assigned by the presence of differentially  
164 upregulated marker genes in each cluster compared to the rest of the cells (Fig. 1I, J,  
165 L, and M, and Tables S1, S2). The heatmap representations indicate specifically  
166 expressed marker genes in different cell types (Fig. 1J, M). At E7.5 RaceID identified  
167 rare cells such as one single E7.5 primordial germ cell (PGC) (Fig. 1L, M and Table  
168 S2). No extraembryonic clusters were detected at E7.5, as the embryos were cut  
169 below the chorion during dissection excluding the ExE and VE cells are mixed with  
170 DE cells. The comparison of the t-SNE maps at E6.75 and E7.5 (Fig. 1I, L) shows that  
171 at E6.75 epiblast and PS/ native mesoderm (NM) cells cluster closely to each other  
172 and only extraembryonic tissues (ExE and VE) form clearly separated clusters (Fig. 1I).  
173 In contrast, at E7.5 separable clusters can be detected within the embryonic cell  
174 clusters, demonstrating the increase in expression diversity of embryonic cell types  
175 between E6.75 to E7.5 (Fig. 1L). Of note, no specific subclusters could be found  
176 within the epiblast cells at E6.75 which could represent trajectories towards  
177 mesoderm and endoderm progenitors.

178 Remarkably, at E6.75 *Eomes* is expressed in 209 of 289 cells (72% of all cells),  
179 showing highest expression in the PS/NM cluster (Fig. 1K, and Fig. S1C) and weaker  
180 expression in the epiblast cluster, which is in agreement with the immunofluorescence  
181 staining (Fig. 1B). In addition, *Eomes* expression is found in the extraembryonic  
182 clusters, ExE and VE (Fig. 1K and Fig. S1C). At E7.5 *Eomes* expression is still present  
183 in a subset of epiblast cells, the PS, the NM, the node and the mesoderm (AM and  
184 ExM) and DE clusters (Fig. 1N, Fig. S1D). However, only 35% of cells show RNA  
185 expression, whereas EOMES protein is still broadly detected (Fig. 1H, N). Thus, at  
186 E6.75 *Eomes mRNA* is generally expressed in more cells and at higher levels than at  
187 E7.5 (Fig. 1O). In summary, fluorescent reporter and scRNA-seq analyses  
188 demonstrate that *Eomes* marks prospective AM and DE progenitors within the  
189 posterior region of the epiblast from stages preceding the onset of cell ingression  
190 through the PS and until cells are present in the mesoderm and endoderm cell layer.  
191 ScRNA-seq analyses indicate that the embryonic *Eomes* positive cells at E6.75 are

192 quite similar to each other and the only clusters identified were the PS and early  
193 mesoderm progenitors (PS/NM Fig. 1I) and intermediate progenitor clusters were not  
194 detected.

195

### 196 ***A novel *Mesp1*<sup>mVenus</sup> allele identifies *Eomes* dependent AM progenitors***

197 *Mesp1* represents one of the earliest markers of mesoderm within the *Eomes* positive  
198 cell population and is a direct transcriptional target gene of EOMES (Costello et al.  
199 2011). Lineage tracing with a *Mesp1-Cre* allele shows that it faithfully labels the ExM  
200 and the AM (Saga et al. 1999; Lescroart et al. 2014; Lescroart et al. 2018; S. S.-K.  
201 Chan et al. 2013). Thus, to distinguish mesoderm and DE progenitors during the first  
202 day of germ layer formation we generated a fluorescent *Mesp1*<sup>mVenus</sup> reporter allele.  
203 We inserted the coding sequence of membrane bound Venus (mV) into the start  
204 codon of the *Mesp1* gene locus followed by a T2A cleavage site and the *Mesp1*  
205 coding sequence to maintain functional *Mesp1* expression from the resulting reporter  
206 allele (Fig. 2A-C). Homozygous *Mesp1*<sup>mVenus</sup> (*Mesp1*<sup>mV</sup>) mice are viable and fertile,  
207 demonstrating sufficient *Mesp1* expression from the reporter allele.

208 We analyzed the emergence of earliest *Eomes* dependent mesoderm progenitors in  
209 *Mesp1*<sup>mV</sup> embryos and found first *Mesp1* positive cells already at E6.5 in the proximal  
210 epiblast during early PS formation (Fig. 2D, E). At this stage the PS has not yet  
211 extended towards the distal part of the embryo, and also no *Mesp1*<sup>mV</sup> positive cells  
212 are present in distal portions of the epiblast (Fig. 2F). Notably, almost all cells leaving  
213 the early proximal PS show *Mesp1* reporter expression identifying them as mesoderm  
214 progenitors (Fig. 2E, zoom). Once *Mesp1*<sup>mV</sup> positive cells leave the PS they rapidly  
215 migrate proximally and anteriorly to their destinations of ExM and AM (Fig. 2G).  
216 Importantly, *Mesp1*<sup>mV</sup> positive cells are already detected in the epithelial portion of the  
217 PS (Fig. 2H zoom, arrowheads), indicating that mesoderm fate specification takes  
218 place before cells delaminate from the epiblast. At E7.25 the mesodermal wings have  
219 migrated far anteriorly (Fig. 2J). *Mesp1*<sup>mV</sup> positive cells constitute the major population  
220 within the EOMES positive mesodermal layer, (Fig. 2I). While the proximal mesoderm  
221 is mainly composed of *Mesp1*<sup>mV</sup> positive cells, increasing numbers of *Mesp1*<sup>mV</sup>  
222 negative cells were found more distally (Fig. 2I, L, zoom, arrowheads). At E7.25  
223 nascent *Mesp1*<sup>mV</sup> cells are still emerging from the proximal PS (Fig. 2K), while more  
224 distally no *Mesp1*<sup>mV</sup> positive cells were detected in the PS (Fig. 2L). *Mesp1* therefore



225 marks the earliest population of mesoderm progenitors that are continuously  
226 produced between E6.5 and E7.5 from *Eomes* expressing cells. *Mesp1* positive  
227 progenitors are present throughout the mesoderm layer but they are preferentially  
228 generated in the proximal domains of the PS.

229

230 ***DE and AM progenitors become fate specified in different regions of the epiblast***

231 Next, we investigated the spatial distribution of the *Eomes* dependent cell lineages  
232 (Costello et al. 2011; Arnold et al. 2008). To simultaneously detect DE and AM  
233 progenitors we used FOXA2 immunofluorescence staining of embryos carrying the  
234 *Mesp<sup>mv</sup>* reporter allele. Previous reports and our data show that *Foxa2* is expressed  
235 in the VE and during gastrulation from E6.5 onwards in the epiblast, the APS/node,  
236 and its derivatives DE and axial mesoderm (Fig. 3, (Ang et al. 1993; Sasaki and Hogan  
237 1993; Monaghan et al. 1993; Viotti, Nowotschin, et al. 2014)). Previous lineage tracing  
238 by Cre-induced recombination and imaging by fluorescent reporters showed that  
239 *Foxa2* expression faithfully labels DE progenitors (Park et al. 2008; Frank et al. 2007;  
240 Imuta et al. 2013). While *Foxa2* is not strictly required for the initial egression of DE  
241 cells into the VE layer (Viotti, Nowotschin, et al. 2014), *Foxa2* deficient embryos lack  
242 foregut and midgut DE formation and only generate hindgut endoderm (Dufort et al.  
243 1998; Ang and Rossant 1994; Weinstein et al. 1994).

244 The simultaneous analysis of *Mesp1<sup>mv</sup>* and FOXA2 showed that AM and DE  
245 progenitors are generated at distinct domains along the PS (Fig. 3A-J). At E6.5 FOXA2  
246 positive DE progenitors in the posterior epiblast are located more distally and still  
247 remain within the epithelial epiblast in comparison to proximally located *Mesp1<sup>mv</sup>*  
248 positive AM cells, of which some have already delaminated from the PS as observed  
249 in sagittal (Fig. 3A), or in consecutive transverse sections (Fig. 3C-F). Additionally,  
250 FOXA2 broadly marks the cells of the VE (Fig. 3A-J). The distribution of proximally  
251 located AM and distal DE progenitors was also found at E6.75 (Fig. 3B) and E7.0 (Fig.  
252 3G-J), where the most proximal sections showed *Mesp1<sup>mv</sup>* expression in the PS and  
253 in cells of the mesoderm layer (Fig. 3G). More distal regions of the PS contained a mix  
254 of *Mesp1<sup>mv</sup>* and FOXA2 single positive cells. The vast majority of cells in the  
255 mesoderm layer were *Mesp1<sup>mv</sup>* expressing, and only rarely *Mesp1<sup>mv</sup>* positive cells that  
256 also showed a FOXA2 signal were found (Fig 3H,I, arrowheads). These cells are  
257 located at the mid-level along the proximo-distal axis where the domains of *Mesp1<sup>mv</sup>*

258 positive cells and of FOXA2 positive cells meet and they most likely represent recently  
259 described FOXA2 positive progenitors that contribute to the cardiac ventricles (Bardot  
260 et al. 2017). Their location only at the border of *Mesp1* and *Foxa2* positive areas  
261 suggests that these are specialized cells rather than bipotential progenitors. At the  
262 distal tip of the PS only FOXA2 positive cells were found within the streak and all cells  
263 that have left the PS were FOXA2 positive (Fig. 3J). In summary, AM and DE  
264 progenitors are generated in mostly non-overlapping domains and cells are already  
265 lineage-separated when they are still located within the epithelial epiblast at the level  
266 of the PS.

267 Next, we employed scRNA-seq to analyze the segregation of *Foxa2* expressing DE  
268 and *Mesp1* expressing AM progenitors by their RNA expression profiles (Fig. 3K-N).  
269 At E6.75 and E7.5 *Mesp1* and *Foxa2* expression is found in distinct cells on the t-SNE  
270 maps (Fig. 3K-M and Fig. S2A-C). As expected, plotting cells for their expression of  
271 *Eomes*, *Mesp1* and *Foxa2* at E6.75 shows co-expression of *Mesp1* or *Foxa2* with  
272 *Eomes* (Fig. 3N, first and second plot). Notably, the *Mesp1* and *Foxa2* expressing cells  
273 are mutually exclusive, with the exception of one observed *Mesp1*/*Foxa2* double  
274 positive cell (Fig. 3N, third plot), which is also in accordance with the  
275 immunofluorescence staining analysis (Fig. 3A-J). At E7.5 *Eomes* starts to be rapidly  
276 downregulated and consequently increasing numbers of *Mesp1* or *Foxa2* single  
277 positive, *Eomes* negative cells are found (Fig. S2D, Tables S3, S4), and *Mesp1* positive  
278 and *Foxa2* positive cell populations remain exclusive (Fig. S2D). To confirm our  
279 analysis we also employed a published scRNA-seq data set that contains larger cell  
280 numbers (Pijuan-Sala et al. 2019). Here, we included and combined timepoints from  
281 E6.5 to E7.5 (E6.5, E6.75, E7.0, E7.25, E7.5) and performed cell clustering using the  
282 Seurat package (Stuart et al. 2019). Very similar clusters were identified as from our  
283 dataset (Fig. S3A, B) and similarly to the analysis of our dataset, the *Mesp1* and *Foxa2*  
284 expression domains on the UMAP representations were largely non-overlapping (Fig.  
285 S3D, E). Also, plotting the cells for their expression values at separate timepoints  
286 shows that *Mesp1* positive and *Foxa2* positive cell populations are mostly exclusive  
287 (Fig. S4). Quantification of *Mesp1*/*Foxa2* double positive cells within both datasets  
288 shows that more than 95% of *Mesp1* or *Foxa2* positive cells are single positive and  
289 only between 1.7 to 5% of cells at different timepoints are double positive (Fig. S3F

290 and Fig. S4) demonstrating the separation of the progenitor populations of AM and  
291 DE.

292 Interestingly, at E6.75 the *Mesp1* positive cells cluster closely together on the t-SNE  
293 map, whereas *Foxa2* positive cells are found more scattered within the clusters of  
294 Epi/PS/NM (Fig. 3K, L, M and Fig. S2E). This suggests that *Foxa2* positive cells have  
295 less homogenous expression profiles which are more similar to unspecified epiblast  
296 cells at these early timepoints of analysis, since at E7.5 *Foxa2* positive cells form  
297 discrete clusters of node and DE cells (Fig. S2B, C, and F).

298 In summary, the simultaneous analysis of early emerging AM and DE progenitors at  
299 E6.5 reveals the spatial separation of their sites of origin within the population of  
300 *Eomes* expressing cells. *Mesp1<sup>mv</sup>* mesoderm progenitors are generated more  
301 proximally and leave the PS earlier than distally generated *Foxa2* positive DE  
302 progenitors. ScRNA-seq analysis shows that the progenitor populations of AM and  
303 DE are separated as shown by the exclusive expression of early markers, *Mesp1* and  
304 *Foxa2*.

305

### 306 ***Eomes* dependent AM progenitors are specified at earlier timepoints than DE** 307 ***progenitors***

308 Our analyses and published literature show that the generation of mesoderm and DE  
309 progenitors is spatially separated along the forming PS (Fig. 3; (Lawson and Pedersen  
310 1987; Tam and Beddington 1987; Lawson et al. 1991; Tam and Behringer 1997). The  
311 fact that the PS elongates over time in a proximal to distal fashion suggests that  
312 mesoderm and DE progenitor specification is also temporally separated. To test the  
313 temporal sequence of lineage specification downstream of *Eomes*, we performed time  
314 dependent genetic lineage tracing using a tamoxifen inducible *Eomes<sup>CreER</sup>* mouse line  
315 expressing CreER from the *Eomes* locus (Pimeisl et al. 2013) in combination with a  
316 Cre inducible fluorescent reporter ((Muzumdar et al. 2007), Fig. 4A). This *Rosa26<sup>mTmG</sup>*  
317 reporter strain ubiquitously expresses membrane bound Tomato that switches to  
318 membrane bound GFP following Cre recombination. Short-term administration of  
319 tamoxifen (90 min) to dissected and morphologically staged embryos in culture was  
320 used to label *Eomes* positive cells at different developmental timepoints from E6.25 -  
321 E7.5 (Fig. 4A). Embryos were sorted into three groups according to the stage at the  
322 time of dissection (E6.25-E6.5, E6.75-E7.0, E7.25-7.5), tamoxifen treated for 90

323 minutes and cultured for additional 24 hours. Whole embryos were imaged as z-  
324 stacks to evaluate if the presence of GFP labeled cells within the mesoderm and  
325 endoderm layers depends on the timepoint of Cre induction (Fig. 4A and B). Of note,  
326 in addition to labeling of epiblast derived cell types, this approach also marks VE cells,  
327 since *Eomes* expression is also found here (Fig. 4C).

328 In a first analysis, 53 of 55 embryos showed labeling of both endoderm and mesoderm  
329 (including EmM and ExM) (Fig. 4B). Interestingly, three E6.25 embryos expressed GFP  
330 only within the ExM, supporting the observation that ExM is the first cell population  
331 generated in the PS (Parameswaran and Tam 1995; Kinder et al. 1999). As we were  
332 interested in the DE population within the labeled cells of the endoderm layer  
333 originating from *Eomes* positive cells in the posterior epiblast/PS we needed to  
334 discriminate VE from DE cells. Therefore we additionally stained all E6.25-E6.5 labeled  
335 embryos and some of the older embryos with the lectin dolichos biflorus agglutinin  
336 (DBA-lectin) that specifically labels VE cells but not DE (Fig. 4D) (Kimber 1986). This  
337 revealed that the GFP positive cells in the endoderm layer of 9 out of 13 (69%) E6.25-  
338 E6.5 labeled embryos were exclusively of VE origin, indicating that no DE is formed  
339 yet in most of the E6.25-E6.5 embryos (Fig. 4D). All E6.25-E6.5 embryos had GFP  
340 positive cells in mesoderm cells (EmM 10/13) (Fig. 4B). The GFP positive cells in the  
341 endoderm layer of the remaining 4 E6.25-E6.5 labeled embryos were of mixed DE and  
342 VE origin. Thus, we confirm the existence of a short time window before E6.5 during  
343 which *Eomes* expressing cells in the posterior epiblast give rise to mesoderm (Fig.  
344 4D, E). Starting from E6.5 progenitors of mesoderm and DE are both present (Fig. 3)  
345 and therefore embryos that were tamoxifen treated at E6.5-E6.75 or later showed GFP  
346 labeling both in mesoderm and DE cells (Fig. 4D, E). In summary, lineage tracing of  
347 *Eomes* positive cells in E6.25-E6.5 embryos shows robust mesoderm labeling but  
348 absence of DE labeling in 70 % of the embryos, while at later stages all embryos show  
349 labeling of both mesoderm and DE cells (Fig. 4B, E). These experiments thus confirm  
350 that mesoderm and DE specification is also temporally separated so that mesoderm  
351 progenitor specification slightly proceeds DE formation.

352

353

354

355 ***Eomes* expressing epiblast cells differentiate directly to either AM or DE**  
356 ***lineages***

357 As the RaceID algorithm did not identify distinct progenitor populations for AM and  
358 DE within the *Eomes* positive, lineage marker negative cells of the epiblast (Fig. 1I, L),  
359 we wanted to investigate scRNA-seq expression profiles during this lineage  
360 segregation in more detail. Thus, we analyzed the single cell transcriptomes of *Eomes*  
361 positive cells (expression cut-off 0.3 normalized transcript counts) from the datasets  
362 with larger cell numbers (Pijuan-Sala et al. 2019) at timepoints from E6.5 to E7.5.  
363 According to our analysis (Fig. 1, 3) the *Eomes* positive population should include the  
364 unspecified progenitors as well as early AM and DE progenitors. Extraembryonic cells  
365 were excluded from the analysis. VarID (Grün 2020) identified cell clusters  
366 representing the posterior epiblast and two branches consisting of the proximal PS,  
367 NM, AM and ExM and of the distal PS, axial mesoderm (AxM), node, and DE (Fig. 5A  
368 and Fig. S5A).

369 These embryonic *Eomes* positive cells were categorized into three groups of  
370 *Mesp1/Eomes* double positive cells (blue), *Foxa2/Eomes* double positive cells (red),  
371 and *Eomes* single positive cells (grey) (expression cut-off 0.3 normalized transcript  
372 counts for all three genes) (Fig. 5B). Differential gene expression analysis between the  
373 *Eomes/Mesp1* or *Eomes/Foxa2* double positive cells and *Eomes* single positive cells  
374 showed that *Foxa2* positive cells expressed higher endoderm and axial mesoderm  
375 marker genes (e.g. *Sox17*, *Cer1*, *Gsc*) and *Mesp1* positive cells showed increased  
376 expression of mesodermal/mesenchymal/EMT genes (e.g. *Fn1*, *Lefty2*, *Myl7*, *Snai1*)  
377 (Fig. S5B and Table S5). Both *Mesp1* and *Foxa2* positive cells showed a  
378 downregulation of epiblast markers (e.g. *Pou3f1*, *Utf1*, *Slc7a3*) (Fig. S5B and Tables  
379 S5). This indicates that these two cell populations start to differentiate towards their  
380 respective fates. Overall more genes were differentially regulated in *Mesp1* positive  
381 cells than in *Foxa2* positive cells (126 vs. 43 genes >2-fold changed), indicating that  
382 DE progenitors are more similar in their expression profile to cells of the epithelial  
383 epiblast or that AM progenitors are further differentiated.

384 To investigate if there exists a differentiation bias towards either AM or DE progenitors  
385 already within *Eomes* single positive cells we used FateID, an algorithm that quantifies  
386 the fate bias in progenitor cell populations with known trajectories (Herman et al.  
387 2018). We analyzed each timepoint separately to avoid artefacts originating from

388 different developmental stages of cells, with the exception of cells from E6.5 and  
389 E6.75 that were combined to increase cell numbers (Fig. 5C, G and Fig. S5D). To  
390 perform FateID lineage bias analysis we defined early *Eomes/Mesp1* and  
391 *Eomes/Foxa2* double positive cells as target cells and excluded more differentiated  
392 clusters (target cells, shown in red cells in Fig. 5E, F, I, J, and Fig. S5F, G). On the  
393 respective UMAP representations of E6.5/E6.75 cells, early *Mesp1* positive cells are  
394 grouped and *Foxa2* positive cells are more scattered (as described in Fig. 3K, L; Fig.  
395 5C), while at later time points *Eomes/Mesp1* and *Eomes/Foxa2* double positive cells  
396 form two distinct branches (Fig. 5G and Fig. S5D). *Utf1* expression is shown to  
397 indicate the undifferentiated epiblast population within the *Eomes* positive cells (Fig.  
398 5D, H and Fig. S5E) (Tosic et al. 2019; Galonska et al. 2014). We then calculated the  
399 fate bias probabilities (between 0 and 1) of *Eomes* single positive cells for each target  
400 group, i.e. *Eomes/Mesp1* positive cells or *Eomes/Foxa2* positive cells in red (fate bias  
401 probability of 1). The target cells of the other fate appear blue (fate bias probability of  
402 0). This analysis showed that at E6.5/E6.75 *Eomes* single positive cells have a similar  
403 fate bias probability towards both lineages of AM and DE (yellow cells, Fig. 5E, F) and  
404 thus did not exhibit a clear fate-bias towards either lineage. Accordingly, only few  
405 differentially expressed genes were found when we compared expression values in  
406 mesoderm and endoderm biased cells (fate bias probability cut off was set to 0.6 for  
407 each of the respective lineages) and these were mostly not known early lineage  
408 marker genes (12 genes >2-fold changed, Fig. S5C and Table S6). At E7.25 the *Eomes*  
409 single positive cells of the more undifferentiated epiblast (Fig. 5H, *Utf1* positive) were  
410 biased towards *Eomes/Foxa2* positive target cells (orange cells, Fig. 5J). The cells  
411 closer to the branching point mostly did not display a clear fate bias showing an  
412 intermediate probability for both lineages (yellow cells, Fig. 5I, J). This indicates that  
413 at E7.25 most mesoderm downstream of *Eomes* has already been generated and the  
414 majority of the remaining *Eomes* single positive epiblast cells will give rise to DE/axial  
415 mesoderm. Analysis of differentially expressed genes between endoderm and  
416 mesoderm biased cells at E7.25 reveals that epiblast markers are more strongly  
417 expressed in endoderm fated cells whereas mesoderm fated cells already show a  
418 pronounced mesodermal expression profile (52 genes >2-fold changed, Fig. S5C and  
419 Table S6). At E7.0 FateID analysis resulted in an intermediate result between

420 E6.5/E6.75 and E7.25 (Fig. S5E), showing the progression of fate bias towards *Foxa2*  
421 positive population in the *Eomes* expressing epiblast cells over time (Fig. S5F, G).

422 In conclusion, until E7.0 the *Eomes* single positive posterior epiblast cells are not fate  
423 biased towards either lineage before the onset of *Mesp1* or *Foxa2* expression. *Mesp1*  
424 and *Foxa2* are expressed in distinct cell populations and there is no evidence of a cell  
425 population co-expressing lineage markers for mesoderm and DE. This suggests that  
426 cells differentiate directly from a posterior epiblast state to either mesoderm or  
427 endoderm lineages.

428

429

## 430 Discussion

431 To date the understanding of lineage specification on the level of individual cells within  
432 the gastrulation stage embryo remains limited. It is still unclear how cells in close  
433 proximity acquire different fates according to local signaling environments and how  
434 these specification events are regulated in a temporal manner. In this study we have  
435 analyzed the emergence of AM and DE populations that are both dependent on  
436 activities of the transcription factor EOMES (Arnold et al. 2008; Costello et al. 2011;  
437 Teo et al. 2011). Interestingly, we observed that almost all cells passing through the  
438 PS during the first day of gastrulation (E6.5 to E7.5) are positive for EOMES. These  
439 cells give rise to the mesoderm derivatives of the anterior embryo and the entire DE  
440 as previously shown by lineage tracing of *Eomes* positive cells (Costello et al. 2011;  
441 Arnold et al. 2008). The *Eomes* positive population in the early PS/mesendoderm was  
442 thought to be one of several populations leaving the PS between E6.5 and E7.5  
443 (Robertson 2014). However, our data indicate that early posterior epiblast cells  
444 uniformly express *Eomes*. These results thus indicate that between E6.5 and E7.5 only  
445 cells that will contribute to the mesoderm of the anterior embryo and the DE  
446 progenitors leave the PS and posterior mesodermal tissues are generated after E7.5.  
447 Accordingly, spatial gene regulatory network analysis of gastrulation stage embryos  
448 indicates that separate anterior and posterior mesoderm populations exist at E7.5  
449 (Peng et al. 2019). Our FateID analysis further indicates that AM downstream of *Eomes*  
450 is mainly generated until E7.25. During following stages mesoderm formation is most  
451 likely regulated by other factors such as the related T-box factor *T/Brachyury* and  
452 WNT signaling (Koch et al. 2017; Wymeersch et al. 2016). The existence of distinct  
453 anterior and posterior mesoderm populations downstream of different T-box factors  
454 has been suggested previously and is also observed in the zebrafish (Kimelman and  
455 Griffin 2000). The molecular details of this transition in the regulation of gastrulation  
456 are currently incompletely understood.

457  
458 The first lineage decision following *Eomes* expression in epiblast cells segregates AM  
459 and DE. Here, we show that the AM and DE marker genes, *Mesp1* and *Foxa2*, are  
460 already expressed in epithelial epiblast cells at the PS and are mostly exclusive.  
461 Therefore, we can place the event of lineage segregation within the PS before cells  
462 migrate to form the mesoderm layer. These results are in agreement with previous



463 observations of a separation of T and FOXA2 protein expression domains in E6.5  
464 embryos (Burtscher and Lickert 2009). Also, earlier cell tracing experiments have  
465 shown that cells are restricted in their potency after their passage through the PS  
466 (Tam et al. 1997). Live embryo imaging analysis has shown that DE and mesoderm  
467 progenitors leave the PS and migrate together within the mesodermal wings before  
468 DE cells insert into the outer VE layer (Viotti, Nowotschin, et al. 2014). As we show  
469 that DE cells are already specified as they leave the PS, it will be interesting to  
470 investigate how DE cells behave within the mesoderm population and which  
471 mechanisms are used to separate them during the anterior-ward migration.

472  
473 During early gastrulation AM and ExM subtypes as well as most of the DE cells are  
474 generated (Parameswaran and Tam 1995; Lawson et al. 1991; Tam et al. 2007;  
475 Lawson et al. 1986; Lawson and Pedersen 1987; Kinder et al. 1999). Here, we show  
476 that mesoderm and DE are produced at distinct places along the PS and that  
477 mesoderm is specified earlier than DE as summarized in a model (Fig. 6). The proximal  
478 domain of the PS generates only mesoderm from the initiation of gastrulation. With a  
479 slight temporal delay the most distal tip of the PS produces only *Foxa2* positive DE  
480 and axial mesoderm progenitors, however, in this study we did not address the  
481 generation and distribution of the axial mesoderm. The intermediate PS regions  
482 generate both mesoderm and endoderm progenitors and here we also find some rare  
483 *Mesp1/Foxa2* double positive cells. This data fits well with earlier cell labeling  
484 experiments that had demonstrated that the most proximal PS produces mostly  
485 mesoderm (Lawson et al. 1991; Parameswaran and Tam 1995; Kinder et al. 1999). At  
486 E6.5 mesodermal progenitors already leave the PS, while DE progenitors are present  
487 in the more distal epiblast. To date, the evidence for delayed specification of the DE  
488 was derived from experiments showing that DE progenitor cells appear in the outer  
489 VE endoderm layer only at about E7.0 (Lawson and Pedersen 1987; Lawson et al.  
490 1991). Using genetic timed lineage tracing we now demonstrate the time delay of DE  
491 cell specification in comparison to mesoderm, so that first DE cells are specified about  
492 0.25 days after the mesodermal cells at E6.5 as also inferred from transcriptional  
493 analysis (Peng et al. 2019; Pijuan-Sala et al. 2019).

494

495 Analysis of the fate bias of *Eomes* positive cells, which are not yet expressing *Mesp1*  
496 or *Foxa2* markers, indicates that an unbiased posterior epiblast state directly  
497 progresses to either AM or DE. In our scRNA-seq analysis we did not find evidence  
498 for progenitors co-expressing markers of both lineages, arguing for fast acting control  
499 mechanisms that independently promote AM or DE programs (Fig. 6B). However, we  
500 can't rule out the existence of different, already lineage restricted progenitors for AM  
501 and DE, since we demonstrate that these are spatially separated cell populations.  
502 Embryonic clonal lineage analyses had suggested that the common posterior epiblast  
503 progenitor for mesoderm and DE represents only a very transient cell population since  
504 clones containing both AM and DE cells were only very rarely detected by genetic or  
505 labeled lineage tracing (Tzouanacou et al. 2009; Lawson et al. 1991). Novel  
506 approaches using a combination of scRNA-seq and molecular recording of cell  
507 lineage might be able to provide information on the lineage segregation and  
508 relationship of AM and DE in more detail, which was not explored in existing data sets  
509 to date (M. M. Chan et al. 2019).

510 Genetic experiments in the mouse embryo and cell differentiation studies in culture  
511 have demonstrated that NODAL/SMAD2/3 signals are major regulators in the AM and  
512 DE lineage decision (Dunn et al. 2004; Vincent et al. 2003; van den Aemele et al. 2012;  
513 Costello et al. 2011). Accordingly, elevated levels of NODAL signaling are required for  
514 DE specification, while AM is already formed at lower NODAL signaling levels. How  
515 the signaling thresholds of NODAL/SMAD2/3 signals are interpreted during this  
516 lineage choice remains unresolved. Our study supports previous observations (van  
517 Boxtel et al. 2015; Sako et al. 2016) that NODAL/SMAD2/3 signal interpretation might  
518 involve a temporal signal integration leading to delayed formation of DE in comparison  
519 to AM. Alternatively, additional signals might contribute to this lineage choice, such  
520 as WNT or FGF signals as previously suggested in zebrafish (van Boxtel et al. 2018)  
521 and ES cells (Wang et al. 2017).

522 In conclusion, this study demonstrates that the generation of the *Eomes* dependent  
523 lineages of AM and DE is spatiotemporally separated during early gastrulation. These  
524 cells are molecularly separated early during the differentiation process and share as  
525 last common progenitor the *Eomes* expressing posterior epiblast cells.

526

527

## 528 **Materials and Methods**

### 529 **Generation of the *Mesp1*<sup>mVenus</sup> allele**

530 To generate a fluorescent allele to follow *Mesp1* expressing cells during gastrulation  
531 we targeted the *Mesp1* locus by homologous recombination to insert a membrane  
532 bound Venus fluorescent protein reporter (mVenus) into the locus. Following the  
533 mVenus coding sequence the *Mesp1* coding sequence including a 3xFLAG C-  
534 terminal tag was inserted. These two coding sequences are linked by a T2A peptide,  
535 which leads to co-translational cleavage of the two proteins, resulting in independent  
536 mVenus and Mesp1-3xFLAG proteins (Fig. 2A). The start site of mVenusT2AMesp1-  
537 3xFLAG was inserted at the translational start site of the *Mesp1* gene. The 5'  
538 homologous arm spans from an Afel site upstream of *Mesp1* exon 1 to the *Mesp1*  
539 translational start site. The mVenusT2AMesp1-3xFLAG sequence followed by a bGH  
540 PolyA signal was then inserted via the 5'UTR EcoRI site and a FspA1 site within *Mesp1*  
541 exon1, thereby deleting 337 bp of the *Mesp1* CDS. A PGK-neomycine resistance  
542 (neoR) cassette flanked by loxP sites was inserted downstream of  
543 mVenusT2AMesp1-3xFLAG. Between the mVenusT2AMesp1-3xFLAG insert and the  
544 neoR cassette a NdeI site was introduced for screening by southern analysis. The 3'  
545 homology region spans to a NsiI site downstream of *Mesp1* exon2 and was flanked  
546 by a pMCI-TK negative selection cassette.

547 Linearized targeting vector was electroporated into CCE ES cells, and neomycine and  
548 FIAU resistant ES cell clones were screened by genomic southern blot. Genomic DNA  
549 was digested with NdeI and probed with an external 3' probe (wild type (wt) allele: 8.4  
550 kb, mutant allele: 4.7 kb, Fig. 2B). Two independent positive clones were injected at  
551 morula stage for chimera generation. *Mesp1*<sup>mVenus</sup> mice were genotyped by PCR at  
552 62°C annealing temperature to detect the wild type allele (334 bp) and the knock-in  
553 allele (419 bp) using the following primers: wt forward primer 5'-  
554 CGCTTCACACCTAGGGCTCA -3'; wt reverse primer 5'-  
555 TGTGCGCATACGTAGCTTCTCC -3'; ki forward primer 5'-  
556 GCCAATGCAATCCCGAAGTCTC -3'; ki reverse primer 5'-  
557 GCCCTTGGACACCATTGTCTTG -3' (Fig. 2C). The neomycine cassette was removed  
558 by crossing *Mesp1*<sup>Venus</sup> positive males to females carrying the *Sox2::Cre* transgene  
559 (Vincent and Robertson 2003).

560

## 561 **Mice**

562 *Mesp1*<sup>Venus</sup> mice were backcrossed to the NMRI strain and otherwise kept as  
563 homozygotes, since they were viable and fertile and showed no obvious phenotypic  
564 differences to wt. *Eomes*<sup>mTnG</sup> mice were also kept on a NMRI background and were  
565 kept as heterozygotes. Mice were maintained as approved by the  
566 Regierungspräsidium Freiburg (license numbers G11/31 and X19/O2F).

567

## 568 **Whole mount immunofluorescence of embryos**

569 Embryos were dissected in PBT (PBS with 0,1% Tween-20), fixed for one hour in 4%  
570 PFA in PBS at 4°C or on ice and washed twice in PBT. At this point embryos can be  
571 kept at 4°C for at least a month. To perform the staining embryos were permeabilized  
572 in 0.3% Triton X-100 in PBT at RT for 30 min. Embryos were blocked for 2 hours at  
573 RT in blocking solution (1% BSA in PBT). The primary antibodies (for list of antibodies  
574 see ‘immunofluorescence on embryo sections’) were incubated in blocking solution  
575 at 4°C over night. Embryos were washed 4 x 5min in PBT at RT and then incubated  
576 with the secondary antibodies in blocking solutions for 3 hours at RT. Embryos were  
577 washed 2 x 5 min in PBT at RT and then stained with DAPI for 30 min at RT to  
578 overnight at 4°C and then washed with PBT. Embryos were stored and imaged in  
579 PBT. Imaging was performed on a Zeiss inverted laser-scanning microscope or a  
580 Zeiss spinning disk inverted microscope in glass bottom dishes.

581

## 582 **Immunofluorescence on embryo sections**

583 Embryos were fixed in 4% PFA for one hour at 4°C in the deciduae that were opened  
584 to expose the embryo. Deciduae were washed with PBT and then processed through  
585 15% and 30% sucrose/PBS at 4°C and incubated for at least one hour in embedding  
586 medium (15% sucrose/7.5% gelatin in PBS) at RT prior to embedding. 6-7 µm thick  
587 sections were cut with a Leica cryotome. To perform the immunofluorescence  
588 staining sections were washed 3 x 5 min in PBS and permeabilized in PBT containing  
589 0.2% Triton-X100. Sections were blocked in blocking solution (1% BSA in PBT) for  
590 one hour at RT. The primary antibodies were added in blocking solution at 4°C over  
591 night. The slides were washed 3 x 5 min with PBS and then incubated with the  
592 secondary antibody in blocking solution for one hour at RT. After washing the  
593 antibody away with PBS, the sections were stained with DAPI in PBT for 5 min and

594 then mounted with ProLong Diamond Antifade Mountant (Life technologies P36970)  
595 and imaged on an inverted Zeiss Axio Observer Z1 microscope. Primary antibodies  
596 used: GFP (1:1000, Abcam ab13970), RFP (1:500, Rockland 600-401-379), EOMES  
597 (1:300, Abcam ab23345), FOXA2 (1:500, Cell Signaling 8186). Secondary Alexa-Fluor-  
598 conjugated antibodies (Life Technologies) were used at a dilution of 1:1000.

599

### 600 **Time dependent lineage tracing using the *Eomes*<sup>CreER</sup> allele**

601 Embryos were isolated on E6 or E7 in prewarmed dissection medium (10% fetal calf  
602 serum (FCS) in DMEM/F12 containing Glutamax) and were then placed in embryo  
603 culture medium (50% DMEM/F-12 containing Glutamax and 50% Rat Serum)  
604 containing 10  $\mu$ M of 4-OH-tamoxifen (Sigma H7904, dissolved at 10mM in DMSO) for  
605 90 min. Embryos were washed 3x in dissection medium and placed individually in  
606 ibidi 8-well slides in embryo culture medium without 4-OH-Tamoxifen. Embryos were  
607 cultured for 24 hours in regular tissue culture incubators at 37°C with 5% CO<sub>2</sub>. A  
608 picture was taken before and after these 24 hours of each individual embryo. After  
609 the incubation embryos were fixed and stained with GFP and RFP antibodies as  
610 described above and imaged on a Zeiss spinning disk inverted microscope in glass  
611 bottom dishes.

612

### 613 **Fluorescent DBA-Lectin staining on whole mount embryos**

614 Embryos from the lineage tracing experiments were re-stained with the biotinylated  
615 lectin dolichos biflorus agglutinin (DBA) (Sigma L6533). Because embryos were  
616 already stained with GFP and RFP antibodies, no extra blocking step was performed.  
617 Embryos were washed in PBT and then the DBA-lectin was added at a dilution of  
618 1:1000 in PBS with 1% BSA at 4°C over night. The next day embryos were washed 3  
619 x 10 min with PBT and then incubated with Alexa-Fluor-647-streptavidin (Molecular  
620 Probes, S21374, dissolved in PBS at 1mg/ml) in PBS containing 1% BSA at a dilution  
621 of 1:500 for one hour at RT. Before adding the streptavidin the tube was quickly  
622 centrifuged. Finally, embryos were washed 3x in PBT and imaged on a Zeiss inverted  
623 laser-scanning microscope in glass bottom dishes.

624

625

626

## 627 **Collection of embryo cells for single-cell RNA sequencing**

628 Embryos were dissected in pre-warmed dissection medium (10% fetal calf serum  
629 (FCS) in DMEM/F12 containing Glutamax) and washed in pre-warmed PBS.

630 For the E6.75 timepoint the extraembryonic part was cut off and a picture of each  
631 embryo was taken and single embryos were transferred into the wells of a pre-warmed  
632 non-adhesive 96-well plate containing 40  $\mu$ l of TrypLE Express (Gibco 12604013). The  
633 wells were coated with FCS before adding the TrypLE. Embryos were incubated at  
634 37°C for 10 minutes with pipetting up and down once in between and at the end to  
635 make a single cell solution. Dissociation was stopped with 120  $\mu$ l of dissection  
636 medium and cells were centrifuged for 2 min at 1000 rpm in the 96-well plate. The  
637 supernatant was removed and cells from one embryo were resuspended in 200  $\mu$ l  
638 cold PBS. For hand-picking, the drop containing the cells was placed in a plastic petri  
639 dish. Cells were picked under a Leica M165 FC binocular using ES-blastocyst  
640 injection pipettes (BioMedical Instruments, blunt, bent ID 15  $\mu$ m, BA=35°) and placed  
641 into 1.2  $\mu$ l lysis buffer containing polyT primer with unique cell barcode. Embryos from  
642 the E7.5 timepoint were cut under to chorion to include the extraembryonic mesoderm  
643 in the analysis. The embryos were imaged and the embryos of one or two litters were  
644 pooled and processed in an FCS coated eppendorf tube in the same way as the E6.75  
645 embryos. After centrifugation the cells were resuspended in 200  $\mu$ l PBS and kept on  
646 ice until flow sorting.

647

## 648 **Single-cell RNA amplification and library preparation**

649 Single-cell RNA sequencing of 576 hand-picked cells (E6.75) was performed using  
650 the CEL-Seq2 protocol while of 1152 flow-sorted cells (E7.5) was performed using the  
651 mCEL-Seq2 protocol (Hashimshony et al. 2016; Herman et al. 2018). Eighteen  
652 libraries with 96 cells each were sequenced per lane on Illumina HiSeq 2500 or 3000  
653 sequencing system (pair-end multiplexing run) at a depth of ~200,000-250,000 reads  
654 per cell.

655

## 656 **Quantification of transcript abundance**

657 Paired end reads were aligned to the transcriptome using bwa (version 0.6.2-r126)  
658 with default parameters (Li and Durbin 2010). The transcriptome contained all gene  
659 models based on the mouse ENCODE VM9 release downloaded from the UCSC

660 genome browser comprising 57,207 isoforms, with 57,114 isoforms mapping to fully  
661 annotated chromosomes (1 to 19, X, Y, M). All isoforms of the same gene were  
662 merged to a single gene locus. Furthermore, gene loci overlapping by >75% were  
663 merged to larger gene groups. This procedure resulted in 34,111 gene groups. The  
664 right mate of each read pair was mapped to the ensemble of all gene loci and to the  
665 set of 92 ERCC spike-ins in sense direction (Baker et al. 2005). Reads mapping to  
666 multiple loci were discarded. The left read contains the barcode information: the first  
667 six bases corresponded to the unique molecular identifier (UMI) followed by six bases  
668 representing the cell specific barcode. The remainder of the left read contains a polyT  
669 stretch. For each cell barcode, the number of UMIs per transcript was counted and  
670 aggregated across all transcripts derived from the same gene locus. Based on  
671 binomial statistics, the number of observed UMIs was converted into transcript counts  
672 (Grün et al. 2014).

673

#### 674 **Clustering and visualization of mCEL-Seq2 data**

675 Clustering analysis and visualization of the data generated in this study were  
676 performed using the RaceID3 algorithm (Herman et al. 2018). The numbers of genes  
677 quantified were 19,574 and 20,108 in the E6.75 and E7.5 datasets, respectively. Cells  
678 with a total number of transcripts <3,000 were discarded and count data of the  
679 remaining cells were normalized by downscaling. Cells expressing >2% of *Kcnq1ot1*,  
680 a potential marker for low-quality cells (Grün et al. 2016), were not considered for  
681 analysis. Additionally, transcript correlating to *Kcnq1ot1* with a Pearson's correlation  
682 coefficient >0.65 were removed. The following parameters were used for RaceID3  
683 analysis: mintotal=3000, minexpr=5, outminc=5, probthr=10<sup>-4</sup>. Mitochondrial,  
684 ribosomal as well as genes starting with 'Gm' were excluded from the analysis. We  
685 observed strong batch effects in E6.75 dataset based on the day of the hand-picking.  
686 Batch effects were corrected by matching mutual nearest neighbors (MNNs) as  
687 described previously (Haghverdi et al. 2018). mnnCorrect function from the scan  
688 package was used for the batch correction (Lun et al. 2016). MNN-based batch  
689 correction was also performed on the combined *Eomes* positive dataset used for  
690 FateID analysis.

691

692

## 693 **Clustering and visualization of mouse gastrulation atlas data**

694 Processed atlas data on mouse organogenesis from (Pijuan-Sala et al. 2019) was  
695 downloaded from ArrayExpress (accession number: E-MTAB-6967). The following  
696 time points and sequencing batches were analyzed: E6.5 (sequencing batch 1), E6.75  
697 (sequencing batch 1), E7 (sequencing batches 1, 2 and 3), E7.25 (sequencing batch  
698 2) and E7.5 (sequencing batches 1 and 2). Cells defined as doublets in the study were  
699 removed from the analysis. Integration of datasets from different time points and  
700 sequencing batches was performed using Seurat version 3 with default settings  
701 (Stuart et al. 2019). Ribosomal genes (small and large subunits) as well as genes with  
702 *Gm*-identifiers were excluded from the data prior to integration. The integrated  
703 dataset contained 45,196 cells. A focused analysis of *Eomes*-positive cells was  
704 performed using VarID (Grün 2020). From the complete dataset containing 45,196,  
705 cells with a total number of transcripts <6,000 were discarded and count data of the  
706 remaining cells were normalized by downsampling. Cells having normalized *Eomes*  
707 transcript counts >0.3 were considered as *Eomes*-positive (14,329 cells) and further  
708 clustered and visualized using VarID with the following parameters: large=TRUE,  
709 pcaComp=100, regNB=TRUE, batch=batch, knn=50, alpha=10, no\_cores=20. Each  
710 batch contained cells from different time points and sequencing libraries.  
711 Dimensionality reduction of the datasets was performed using Uniform Manifold  
712 Approximation and Projection (UMAP).

713

## 714 **FateID analysis**

715 In order to investigate the transcriptional priming of single *Eomes* positive cells  
716 towards the mesodermal and definitive endodermal (DE) fates, FateID (Herman et al.  
717 2018) was run on the combined E6.75 and E7.5 dataset with cells having normalized  
718 *Eomes* transcript counts >0.3 using default parameters. *Mesp1* positive (mesoderm  
719 specified, normalized transcript count >0.3) and *Foxa2* positive (DE specified,  
720 normalized transcript count >0.3) cells were used as target cells. Extra-embryonic  
721 cells were excluded from the FateID analysis and t-distributed stochastic neighbor  
722 embedding was used for dimensional reduction and visualization of the results.  
723 Differential gene expression analysis was performed between cells biased towards  
724 one of the lineages with fate bias probability >0.5 using `diffexpnb` function. FateID  
725 analysis was also performed on the mouse gastrulation data (Pijuan-Sala et al. 2019)



726 using the same parameters describe above but separately at the following different  
727 time points: E6.5/E6.75, E7.0, and E7.25. Uniform Manifold Approximation and  
728 Projection coordinates from the VarID analysis were used for the visualization of the  
729 results.

730

### 731 **Differential gene expression analysis**

732 Differential gene expression analysis was performed using the `diffexpnb` function of  
733 `RacelD3` algorithm. Differentially expressed genes between two subgroups of cells  
734 were identified similar to a previously published method (Anders and Huber 2010).  
735 First, negative binomial distributions reflecting the gene expression variability within  
736 each subgroup were inferred based on the background model for the expected  
737 transcript count variability computed by `RacelD3`. Using these distributions, a p value  
738 for the observed difference in transcript counts between the two subgroups was  
739 calculated and multiple testing corrected by the Benjamini-Hochberg method.

740

### 741 **Acknowledgments**

742 We thank T. Bass for technical assistance and the staff of the Life Imaging Center of  
743 the Albert-Ludwigs University Freiburg for help with microscopy. We thank Shankar  
744 Srinivas for teaching Simone Probst mouse imaging techniques. We thank Matthias  
745 Weiß and the CEMT team for support with animal care and Katrin Schüle for critical  
746 reading of the manuscript.

747

### 748 **Competing interests**

749 The authors declare no competing interests

750

### 751 **Funding**

752 This study was supported by the German Research Foundation (DFG) through the  
753 Emmy Noether- and Heisenberg-Programs (AR 732/1-1/2/3, AR 732/3-1), project  
754 grant (AR 732/2-1,) project B07 of SFB 1140 (project ID 246781735), and project A03  
755 of SFB 850 (project ID 89986987) to S.J.A, and by the Germany's Excellence Strategy  
756 (CIBSS – EXC-2189 – Project ID 390939984) to D.G. and S.J.A. DG was supported  
757 by the Max Planck Society, the German Research Foundation (DFG) (SPP1937  
758 GR4980/1-1, GR4980/3-1, and GRK2344 MeInBio), by the DFG under Germany's

759 Excellence Strategy (CIBSS – EXC-2189 – Project ID 390939984), by the ERC (818846  
760 – ImmuNiche – ERC-2018-COG), and by the Behrens-Weise-Foundation.

761

### 762 **Data availability**

763 The primary read files as well as expression count files for the single-cell RNA-  
764 sequencing datasets generated in this study are available to download from GEO  
765 (accession number: GSE151824).

766

## References

- Anders, S. and Huber, W., 2010. Differential expression analysis for sequence count data. *Genome biology*, 11(10), p.R106.
- Ang, S.L. and Rossant, J., 1994. HNF-3 beta is essential for node and notochord formation in mouse development. *Cell*, 78(4), pp.561–574.
- Ang, S.L. et al., 1993. The formation and maintenance of the definitive endoderm lineage in the mouse: involvement of HNF3/forkhead proteins. *Development*, 119(4), pp.1301–1315.
- Arnell, R.M., Fossat, N. and Tam, P.P.L., 2013. Wnt signalling in mouse gastrulation and anterior development: new players in the pathway and signal output. *Current Opinion in Genetics and Development*, 23(4), pp.454–460.
- Arnold, S.J. and Robertson, E.J., 2009. Making a commitment: cell lineage allocation and axis patterning in the early mouse embryo. *Nature Reviews Molecular Cell Biology*, 10(2), pp.91–103.
- Arnold, S.J. et al., 2008. Pivotal roles for eomesodermin during axis formation, epithelium-to-mesenchyme transition and endoderm specification in the mouse. *Development*, 135(3), pp.501–511.
- Baker, S.C. et al., 2005. The External RNA Controls Consortium: a progress report. *Nature Methods*, 2(10), pp.731–734.
- Bardot, E. et al., 2017. Foxa2 identifies a cardiac progenitor population with ventricular differentiation potential. *Nature Communications*, 8, p.14428.
- Brennan, J. et al., 2001. Nodal signalling in the epiblast patterns the early mouse embryo. *Nature*, 411(6840), pp.965–969.
- Burtscher, I. and Lickert, H., 2009. Foxa2 regulates polarity and epithelialization in the endoderm germ layer of the mouse embryo. *Development*, 136(6), pp.1029–1038.
- Chan, M.M. et al., 2019. Molecular recording of mammalian embryogenesis. *Nature*, 100(6298), p.64.
- Chan, S.S.-K. et al., 2013. Mesp1 patterns mesoderm into cardiac, hematopoietic, or skeletal myogenic progenitors in a context-dependent manner. *Cell Stem Cell*, 12(5), pp.587–601.
- Ciruna, B.G. and Rossant, J., 1999. Expression of the T-box gene Eomesodermin during early mouse development. *Mechanisms of Development*, 81(1-2), pp.199–203.
- Conlon, F.L. et al., 1994. A primary requirement for nodal in the formation and maintenance of the primitive streak in the mouse. *Development*, 120(7), pp.1919–1928.

- Costello, I. et al., 2011. The T-box transcription factor Eomesodermin acts upstream of *Mesp1* to specify cardiac mesoderm during mouse gastrulation. *Nature Cell Biology*, 13(9), pp.1084–1091.
- Dufort, D. et al., 1998. The transcription factor HNF3beta is required in visceral endoderm for normal primitive streak morphogenesis. *Development*, 125(16), pp.3015–3025.
- Dunn, N.R. et al., 2004. Combinatorial activities of Smad2 and Smad3 regulate mesoderm formation and patterning in the mouse embryo. *Development*, 131(8), pp.1717–1728.
- Frank, D.U. et al., 2007. System for inducible expression of cre-recombinase from the *Foxa2* locus in endoderm, notochord, and floor plate. *Developmental Dynamics*, 236(4), pp.1085–1092.
- Galonska, C., Smith, Z.D. and Meissner, A., 2014. In Vivo and in vitro dynamics of undifferentiated embryonic cell transcription factor 1. *Stem cell reports*, 2(3), pp.245–252.
- Grün, D., 2020. Revealing dynamics of gene expression variability in cell state space. *Nature Methods*, 17(1), pp.45–49.
- Grün, D. et al., 2016. De Novo Prediction of Stem Cell Identity using Single-Cell Transcriptome Data. *Cell Stem Cell*, 19(2), pp.266–277.
- Grün, D. et al., 2015. Single-cell messenger RNA sequencing reveals rare intestinal cell types. *Nature*, 525(7568), pp.251–255.
- Grün, D., Kester, L. and van Oudenaarden, A., 2014. Validation of noise models for single-cell transcriptomics. *Nature Methods*, 11(6), pp.637–640.
- Haghverdi, L. et al., 2018. Batch effects in single-cell RNA-sequencing data are corrected by matching mutual nearest neighbors. *Nature Biotechnology*, 36(5), pp.421–427.
- Hashimshony, T. et al., 2016. CEL-Seq2: sensitive highly-multiplexed single-cell RNA-Seq. *Genome biology*, 17(1), p.77.
- Herman, J.S., Sagar and Grün, D., 2018. FateID infers cell fate bias in multipotent progenitors from single-cell RNA-seq data. *Nature Methods*, 15(5), pp.379–386.
- Imuta, Y. et al., 2013. Generation of knock-in mice that express nuclear enhanced green fluorescent protein and tamoxifen-inducible Cre recombinase in the notochord from *Foxa2* and *T* loci. *genesis*, 51(3), pp.210–218.
- Kartikasari, A.E.R. et al., 2013. The histone demethylase *Jmjd3* sequentially associates with the transcription factors *Tbx3* and *Eomes* to drive endoderm differentiation. *The EMBO journal*, 32(10), pp.1393–1408.

- Kimber, S.J., 1986. Distribution of lectin receptors in postimplantation mouse embryos at 6-8 days gestation. *The American journal of anatomy*, 177(2), pp.203–219.
- Kimelman, D. and Griffin, K.J., 2000. Vertebrate mesendoderm induction and patterning. *Current Opinion in Genetics and Development*, 10(4), pp.350–356.
- Kinder, S.J. et al., 1999. The orderly allocation of mesodermal cells to the extraembryonic structures and the anteroposterior axis during gastrulation of the mouse embryo. *Development*, 126(21), pp.4691–4701.
- Kinder, S.J., Loebel, D.A. and Tam, P.P., 2001. Allocation and early differentiation of cardiovascular progenitors in the mouse embryo. *Trends in cardiovascular medicine*, 11(5), pp.177–184.
- Kitajima, S. et al., 2000. MesP1 and MesP2 are essential for the development of cardiac mesoderm. *Development*, 127(15), pp.3215–3226.
- Koch, F. et al., 2017. Antagonistic Activities of Sox2 and Brachyury Control the Fate Choice of Neuro-Mesodermal Progenitors. *Developmental Cell*, 42(5), pp.514–526.e7.
- Lawson, K.A., 1999. Fate mapping the mouse embryo. *The International Journal of Developmental Biology*, 43(7), pp.773–775.
- Lawson, K.A. and Pedersen, R.A., 1987. Cell fate, morphogenetic movement and population kinetics of embryonic endoderm at the time of germ layer formation in the mouse. *Development*, 101(3), pp.627–652.
- Lawson, K.A., Meneses, J.J. and Pedersen, R.A., 1986. Cell fate and cell lineage in the endoderm of the presomite mouse embryo, studied with an intracellular tracer. *Developmental Biology*, 115(2), pp.325–339.
- Lawson, K.A., Meneses, J.J. and Pedersen, R.A., 1991. Clonal analysis of epiblast fate during germ layer formation in the mouse embryo. *Development*, 113(3), pp.891–911.
- Lescroart, F. et al., 2018. Defining the earliest step of cardiovascular lineage segregation by single-cell RNA-seq. *Science*, 359(6380), pp.1177–1181.
- Lescroart, F. et al., 2014. Early lineage restriction in temporally distinct populations of Mesp1 progenitors during mammalian heart development. *Nature Cell Biology*.
- Li, H. and Durbin, R., 2010. Fast and accurate long-read alignment with Burrows-Wheeler transform. *Bioinformatics (Oxford, England)*, 26(5), pp.589–595.
- Liu, P. et al., 1999. Requirement for Wnt3 in vertebrate axis formation. *Nature Genetics*, 22(4), pp.361–365.

- Lun, A.T.L., McCarthy, D.J. and Marioni, J.C., 2016. A step-by-step workflow for low-level analysis of single-cell RNA-seq data with Bioconductor. *F1000Research*, 5, p.2122.
- Mohammed, H. et al., 2017. Single-Cell Landscape of Transcriptional Heterogeneity and Cell Fate Decisions during Mouse Early Gastrulation. *CellReports*, 20(5), pp.1215–1228.
- Monaghan, A.P. et al., 1993. Postimplantation expression patterns indicate a role for the mouse forkhead/HNF-3 alpha, beta and gamma genes in determination of the definitive endoderm, chordamesoderm and neuroectoderm. *Development*, 119(3), pp.567–578.
- Muzumdar, M.D. et al., 2007. A global double-fluorescent Cre reporter mouse. *genesis*, 45(9), pp.593–605.
- Nowotschin, S. et al., 2013. The T-box transcription factor Eomesodermin is essential for AVE induction in the mouse embryo. *Genes and Development*, 27(9), pp.997–1002.
- Parameswaran, M. and Tam, P.P., 1995. Regionalisation of cell fate and morphogenetic movement of the mesoderm during mouse gastrulation. *Developmental genetics*, 17(1), pp.16–28.
- Park, E.J. et al., 2008. System for tamoxifen-inducible expression of cre-recombinase from the *Foxa2* locus in mice. *Developmental Dynamics*, 237(2), pp.447–453.
- Peng, G. et al., 2019. Molecular architecture of lineage allocation and tissue organization in early mouse embryo. *Nature*, 572(7770), pp.528–532.
- Pijuan-Sala, B. et al., 2019. A single-cell molecular map of mouse gastrulation and early organogenesis. *Nature*, 566(7745), pp.490–495.
- Pimeisl, I.-M. et al., 2013. Generation and characterization of a tamoxifen-inducible Eomes CreERmouse line. *genesis*, 51(10), pp.725–733.
- Probst, S. et al., 2017. A dual-fluorescence reporter in the Eomes locus for live imaging and medium-term lineage tracing. *genesis*, 55(8), p.e23043.
- Rivera-Pérez, J.A. and Hadjantonakis, A.-K., 2014. The Dynamics of Morphogenesis in the Early Mouse Embryo. *Cold Spring Harbor Perspectives in Biology*, 7(11), p.a015867.
- Rivera-Pérez, J.A., Mager, J. and Magnuson, T., 2003. Dynamic morphogenetic events characterize the mouse visceral endoderm. *Developmental Biology*, 261(2), pp.470–487.
- Robertson, E.J., 2014. Dose-dependent Nodal/Smad signals pattern the early mouse embryo. *Seminars in cell and developmental biology*, 32, pp.73–79.

- Saga, Y. et al., 1999. MesP1 is expressed in the heart precursor cells and required for the formation of a single heart tube. *Development*, 126(15), pp.3437–3447.
- Sako, K. et al., 2016. Optogenetic Control of Nodal Signaling Reveals a Temporal Pattern of Nodal Signaling Regulating Cell Fate Specification during Gastrulation. *CellReports*, 16(3), pp.866–877.
- Sasaki, H. and Hogan, B.L., 1993. Differential expression of multiple fork head related genes during gastrulation and axial pattern formation in the mouse embryo. *Development*, 118(1), pp.47–59.
- Scialdone, A. et al., 2016. Resolving early mesoderm diversification through single-cell expression profiling. *Nature*, 535(7611), pp.289–293.
- Snow, M.H.L., 1977. Gastrulation in the mouse: Growth and regionalization of the epiblast. *Development*, 42(1), pp.293–303.
- Stuart, T. et al., 2019. Comprehensive Integration of Single-Cell Data. *Cell*, 177(7), pp.1888–1902.e21.
- Tam, P.P. and Beddington, R.S., 1987. The formation of mesodermal tissues in the mouse embryo during gastrulation and early organogenesis. *Development*, 99(1), pp.109–126.
- Tam, P.P. and Behringer, R.R., 1997. Mouse gastrulation: the formation of a mammalian body plan. *Mechanisms of Development*, 68(1-2), pp.3–25.
- Tam, P.P. et al., 1997. The allocation of epiblast cells to the embryonic heart and other mesodermal lineages: the role of ingression and tissue movement during gastrulation. *Development*, 124(9), pp.1631–1642.
- Tam, P.P.L. et al., 2007. Sequential allocation and global pattern of movement of the definitive endoderm in the mouse embryo during gastrulation. *Development*, 134(2), pp.251–260.
- Teo, A.K.K. et al., 2011. Pluripotency factors regulate definitive endoderm specification through eomesodermin. *Genes and Development*, 25(3), pp.238–250.
- Tosic, J. et al., 2019. Eomes and Brachyury control pluripotency exit and germ-layer segregation by changing the chromatin state. *Nature Cell Biology*, 10, pp.91–14.
- Tzouanacou, E. et al., 2009. Redefining the Progression of Lineage Segregations during Mammalian Embryogenesis by Clonal Analysis. *Developmental Cell*, 17(3), pp.365–376.
- van Boxtel, A.L. et al., 2015. A Temporal Window for Signal Activation Dictates the Dimensions of a Nodal Signaling Domain. *Developmental Cell*, 35(2), pp.175–185.

- van Boxtel, A.L. et al., 2018. Long-Range Signaling Activation and Local Inhibition Separate the Mesoderm and Endoderm Lineages. *Developmental Cell*, 44(2), pp.179–191.e5.
- van den Ameele, J. et al., 2012. Eomesodermin induces Mesp1 expression and cardiac differentiation from embryonic stem cells in the absence of Activin. *EMBO reports*, 13(4), pp.355–362.
- Vincent, S.D. and Robertson, E.J., 2003. Highly efficient transgene-independent recombination directed by a maternally derived SOX2CRE transgene. *genesis*, 37(2), pp.54–56.
- Vincent, S.D. et al., 2003. Cell fate decisions within the mouse organizer are governed by graded Nodal signals. *Genes and Development*, 17(13), pp.1646–1662.
- Viotti, M., Foley, A.C. and Hadjantonakis, A.-K., 2014. Gutsy moves in mice: cellular and molecular dynamics of endoderm morphogenesis. *Philosophical transactions of the Royal Society of London. Series B, Biological sciences*, 369(1657), pp.20130547–20130547.
- Viotti, M., Nowotschin, S. and Hadjantonakis, A.-K., 2014. SOX17 links gut endoderm morphogenesis and germ layer segregation. *Nature Cell Biology*, 16(12), pp.1146–1156.
- Wang, Q. et al., 2017. The p53 Family Coordinates Wnt and Nodal Inputs in Mesendodermal Differentiation of Embryonic Stem Cells. *Cell Stem Cell*, 20(1), pp.70–86.
- Weinstein, D.C. et al., 1994. The winged-helix transcription factor HNF-3 beta is required for notochord development in the mouse embryo. *Cell*, 78(4), pp.575–588.
- Wen, J. et al., 2017. Single-cell analysis reveals lineage segregation in early post-implantation mouse embryos. *The Journal of biological chemistry*, 292(23), pp.9840–9854.
- Wymeersch, F.J. et al., 2016. Position-dependent plasticity of distinct progenitor types in the primitive streak. *eLife*, 5, p.e10042.



767 **Figure legends**

768 **Figure 1: All cells of the posterior epiblast and AM and DE progenitors between**  
769 **E6.25 and E7.5 express *Eomes***

770 **A-H)** Immunofluorescence (IF) staining of *Eomes*<sup>mTnG</sup> and wild type (wt) embryos (n ≥  
771 3 embryos). In this and all following figures embryos are oriented with anterior (A) to  
772 the left and posterior (P) to the right. **A-D)** Transverse sections of *Eomes*<sup>mTnG</sup> embryos  
773 showing nuclear GFP (nG) and membrane bound Tomato (mT) in *Eomes* expressing  
774 cells. **A)** Before gastrulation onset at E6.25, *Eomes*<sup>mTnG</sup> positive cells mark the  
775 posterior half of the proximal epiblast (Epi) and thus the prospective site of primitive  
776 streak formation. **B)** At E6.75 and **(C)** E7.25 mesoderm and endoderm (ME) cells have  
777 ingressed through the primitive streak and migrate towards the anterior side of the  
778 embryo. The posterior Epi and all ME cells are positive for *Eomes*<sup>mTnG</sup>. **D)** At E7.5 the  
779 posterior epiblast remains *Eomes*<sup>mTnG</sup> positive, but in a restricted domain compared  
780 to earlier stages. The *Eomes*<sup>mTnG</sup> positive mesoderm (Mes) wings have migrated to the  
781 anterior and *Eomes*<sup>mTnG</sup> positive DE cells integrated into the outer endoderm layer. **E)**  
782 Sagittal section of an E6.75 embryo showing *Eomes*<sup>mTnG</sup> expression in the nascent  
783 mesoderm layer. **F)** Maximum intensity projection (MIP) of an E7.5 *Eomes*<sup>mTnG</sup> embryo.  
784 **G)** Sagittal section of an E7.25 wt embryo stained for EOMES showing remaining  
785 expression in the Epi and ME (arrowhead). **H)** Transverse section of an E7.5 wt embryo  
786 stained for EOMES. Endogenous EOMES protein remains present in the posterior Epi  
787 and in the ME layer (arrowhead); however, protein levels are reduced in the more  
788 anterior mesoderm and DE. Scale bars 50 μm. **I-O)** scRNA-seq of wt embryos at E6.75  
789 and E7.5. **I, L)** t-SNE plots with assigned identities to different clusters at **(I)** E6.75  
790 and **(L)** E7.5. Anterior mesoderm (AM), axial mesoderm (AxM), definitive endoderm  
791 (DE), epiblast (Epi), nascent mesoderm (NM), extraembryonic ectoderm (ExE),  
792 extraembryonic mesoderm (ExM), primordial germ cell (PGC), primitive streak (PS),  
793 and visceral endoderm (VE). **J, M)** Heat maps of selected marker genes for the clusters  
794 indicated in **(I, L)** at E6.75 **(J)** and at E7.5 **(M)**. Scale bar represents log2 normalized  
795 transcript counts. **K, N)** t-SNE plots showing the expression of *Eomes* in single cells  
796 at E6.75 **(K)** and E7.5 **(N)**, the scale represents log2 normalized transcript counts. **O)**  
797 Box plot showing the expression levels of *Eomes* by normalized transcript counts in  
798 single cells at both timepoints indicating a higher proportion of *Eomes* expressing  
799 cells at E6.75. **P)** Schematic illustrating the generation of *Eomes* dependent cell

800 lineages in the posterior embryo at E6.75. Nodal is required for the induction of *Eomes*  
801 in the posterior half of the epiblast to induce the early AM and DE progenitors.

802

803 **Figure 2: Generation of a novel *Mesp1*<sup>mVenus</sup> allele to identify the *Eomes***  
804 **dependent mesoderm progenitors**

805 **A)** Schematic of the *Mesp1*<sup>mVenus</sup> allele. The sequence for a membrane-targeted (myr)  
806 Venus protein (mV) and the *Mesp1* coding sequence (CDS) were inserted into the ATG  
807 of the *Mesp1* gene by homologous recombination to generate the *Mesp1*<sup>mVenus</sup>  
808 (*Mesp1*<sup>mV</sup>) allele. **B)** Southern blot analysis of targeted ES cell clones showing a wt  
809 (+/+) and a correctly targeted (*mV*/+) clone. The wt band is detected at 8.4 kb and the  
810 targeted band is detected at 4.7. **C)** Genotyping PCR of a heterozygous (*mV*/+) and a  
811 homozygous (*mV*/*mV*) mouse showing wt band at 334 bp and the *mV* band at 419 bp.  
812 **D-L)** Immunofluorescence stainings with anti-GFP antibody to enhance mV protein in  
813 *Mesp1*<sup>mV</sup> embryos (n ≥ 3 embryos). **D-F)** First *Mesp1*<sup>mV</sup> positive cells appear during  
814 initiation of gastrulation at E6.5. **E, F)** Transverse sections at E6.5 show that early  
815 gastrulating cells in the proximal embryo are positive for *Mesp1*<sup>mV</sup> expression (**E**), while  
816 in more distal regions the PS has not yet formed (**F**). **G)** By E6.75 *Mesp1*<sup>mV</sup> positive  
817 cells rapidly migrate proximally towards the extraembryonic domain and anteriorly. **H)**  
818 *Mesp1*<sup>mV</sup> positive cells are already detected in the epithelial PS (arrowheads in zoom).  
819 **I-L)** By E7.0 and E7.25 the *Mesp1*<sup>mV</sup> positive cells constitute a large population within  
820 the mesoderm layer. **I)** Costaining with anti-EOMES antibody shows that *Mesp1*<sup>mV</sup>  
821 expressing cells represent a subpopulation of EOMES positive cells (arrowheads  
822 indicate few *Mesp1*<sup>mV</sup> negative cells). **J, K)** At E7.25 the proximal mesoderm layer  
823 contains mainly *Mesp1*<sup>mV</sup> positive cells and the PS is also positive for *Mesp1*<sup>mV</sup>. **L)**  
824 More distally *Mesp1*<sup>mV</sup> positive cells are intermixed with *Mesp1*<sup>mV</sup> negative cells and  
825 the PS contains no *Mesp1*<sup>mV</sup> cells. The scale bars represent 50 μm. **D, G, J,** show  
826 MIPs. The approximate levels of the transverse sections are indicated in the MIPs. p,  
827 proximal; d, distal.

828

829 **Figure 3: Spatial separation of *Eomes* dependent *Mesp1*<sup>mV</sup> labelled AM and**  
830 **FOXA2 positive DE progenitors in the posterior epiblast and PS**

831 **A-J)** Immunofluorescence staining in *Mesp1*<sup>mV</sup> embryos using anti-GFP (green) and  
832 anti-FOXA2 (red) antibodies (n ≥ 3 embryos). FOXA2 is present in the cells of the VE.

833 **A)** Sagittal section of an E6.5 *Mesp1<sup>mv</sup>* embryo showing proximal *Mesp1<sup>mv</sup>* positive  
834 cells and distal FOXA2 positive cells in the posterior epiblast (n = 1 embryo). **B)**  
835 Maximum intensity projection (MIP) of an E6.75 *Mesp1<sup>mv</sup>* embryo (n = 2 embryos).  
836 *Mesp1<sup>mv</sup>* positive cells are present in the proximal region of the embryo. FOXA2  
837 positive cells in the VE are covering the whole embryo. In the posterior distal embryo  
838 FOXA2 positive cells are especially dense, probably corresponding to newly  
839 generated FOXA2 positive DE progenitors (arrowhead). **C-J)** Transverse sections at  
840 different levels of E6.5 (**C-F**) and E7.0 (**G-J**) *Mesp1<sup>mv</sup>* embryos. **C** and **G** show the  
841 most proximal and **F** and **J** show the most distal sections. The approximate levels of  
842 the transverse sections are indicated in **A**, along the proximal (p) to distal (d) axis.  
843 Proximal sections contain *Mesp1<sup>mv</sup>* positive cells and the more distal sections contain  
844 FOXA2 positive cells. A single FOXA2 positive cell in the *Mesp1<sup>mv</sup>* positive domain of  
845 the epiblast in (**D**) is indicated with an arrowhead. At E7.0 there is an intermediate  
846 zone of mixed *Mesp1<sup>mv</sup>* and FOXA2 positive cells (**H** and **I**). Few *Mesp1<sup>mv</sup>*/FOXA2  
847 double positive cells are present (**H** and **I** arrowheads). Scale bars represent 100  $\mu$ m  
848 (sagittal section and MIP) and 50  $\mu$ m (transverse sections). **K, L** t-SNE representation  
849 of E6.75 scRNA-seq data showing the expression of *Mesp1* (**K**) and *Foxa2* (**L**). The  
850 scale represents log<sub>2</sub> normalized transcript counts. **M)** t-SNE plot with assigned  
851 identities to different clusters at E6.75. Anterior mesoderm (AM), epiblast (Epi),  
852 extraembryonic ectoderm (ExE), primitive streak (PS), visceral endoderm (VE). **N)**  
853 Scatter plots of single cells at E6.75 indicating *Eomes/Mesp1*, *Eomes/Foxa2* and  
854 *Foxa2/Mesp1* expression. Only one single *Foxa2/Mesp1* double positive cell is  
855 detected. X- and y-axes indicate normalized transcript counts.

856

857 **Figure 4: AM and DE are specified from *Eomes* positive cells following a**  
858 **sequential temporal order**

859 **A)** Schematic of time dependent lineage tracing in E6.25 to E7.5 embryos carrying the  
860 *Eomes<sup>CreER</sup>* and the *Rosa26<sup>mTmG</sup>* reporter alleles (Muzumdar et al. 2007). Embryos were  
861 dissected, staged, and treated for 90 minutes with tamoxifen to induce CreER activity,  
862 followed by culture for 24 hours without tamoxifen and 3D imaging. A total number of  
863 55 embryos were analyzed. **B)** Maximum intensity projection (MIP) and an optical  
864 section of an exemplary embryo treated with tamoxifen at E7.0. The MIP was used  
865 for the identification of all GFP positive cells, while the germ layer position of GFP

866 positive cells was evaluated in optical sections. The contribution of *Eomes* expressing  
867 cells from labeling at different timepoints to different cell types is summarized in the  
868 table below the images. **C)** Transverse section of an E6.25 embryo stained with anti-  
869 EOMES antibody shows EOMES in the VE and in the epiblast. **D)** MIPs of embryos  
870 stained for DBA-lectin to identify VE cells. The upper panel shows an embryo treated  
871 with tamoxifen at E6.5. Lectin staining (arrowhead) of GFP positive cells indicates VE  
872 cells. The other GFP positive cells are in the mesoderm layer. The lower panel shows  
873 an embryo that was treated with tamoxifen on E7.0 and GFP positive cells in the  
874 endoderm layer are of both VE (lectin positive) and DE (lectin negative) origin as shown  
875 by arrowheads. The table summarizes the amounts of embryos with contribution of  
876 GFP positive cells to VE or DE, or both. 27 embryos were reanalyzed for DBA-lectin  
877 staining. **E)** Bar graph representing the percentage of embryos with GFP labeling in  
878 the DE. 70% of early E6.25 labeled embryos do not show GFP positive cell  
879 contribution to the DE lineage. All later timepoints of labeling there is a robust  
880 contribution of labeled cells to the DE lineage. Scale bars are 200  $\mu$ m in **A)** and 50  $\mu$ m  
881 in all other panels.

882

883 **Figure 5: *Eomes* positive posterior epiblast cells directly differentiate to either**  
884 **AM or DE**

885 **A)** UMAP representation of all *Eomes* positive cells from E6.5 to E7.5 embryos with  
886 an expression cut off  $>0.3$  counts after the exclusion of extraembryonic cells (ExE and  
887 VE) (data from (Pijuan-Sala et al. 2019)). Assigned clusters identities are indicated.  
888 Anterior mesoderm (AM), axial mesoderm (AxM), definitive endoderm (DE), posterior  
889 epiblast (post. Epi), nascent mesoderm (NM), extraembryonic mesoderm (ExM),  
890 primitive streak (PS). **B)** UMAP representation of *Mesp1/Eomes* double positive cells  
891 (blue), *Foxa2/Eomes* double positive cells (red), and *Eomes* single positive cells (grey)  
892 within all *Eomes* positive cells. The cut off for *Mesp1* and *Foxa2* expression was set  
893 to  $>0.3$  counts. **C, D)** *Eomes* positive cells from E6.5/E6.75 were clustered and *Mesp1*  
894 and *Foxa2* (**C)** and *Utf1* (**D)** expression was plotted onto the UMAP representation. **E,**  
895 **F)** FateID analysis of embryonic *Eomes* positive cells from timepoints E6.5 and E6.75.  
896 The fate bias probability is indicated in single *Eomes* positive cells towards *Mesp1*  
897 positive cells (**E)** and *Foxa2* positive cells (**F)** (red, target cells). **G, H)** *Eomes* positive  
898 cells from E7.25 were clustered and *Mesp1* and *Foxa2* (**G)**, and *Utf1* (**H)** expression

899 was plotted onto the UMAP representation. **I, J**) FateID analysis of embryonic *Eomes*  
900 positive cells at timepoint E7.25. The fate bias probability is indicated in single *Eomes*  
901 positive cells towards *Mesp1* positive cells (**I**) and *Foxa2* positive cells (**J**) (red, target  
902 cells). Color scale represents fate bias probabilities on the scale from 0 to 1. Scale bar  
903 for gene expression on UMAP maps represents log<sub>2</sub> normalized transcript counts.

904

905 **Figure 6: Model of spatial and temporal separation of DE and AM lineage**  
906 **specification downstream of *Eomes***

907 **A)** Induction of *Eomes* by NODAL/SMAD2/3 signals leads to the specification of AM  
908 and DE lineages. AM marked by *Mesp1* expression is generated in the proximal PS  
909 and *Foxa2* positive cells give rise to DE in the distal PS. The schematic shows an  
910 E6.5 embryo where few AM progenitor cells have already delaminated from the PS,  
911 while DE progenitor cells are still entirely located in the epiblast. The VE is positive for  
912 *Foxa2*. Proximal (p) and distal (d). **B)** Both AM and DE progenitor cells are specified  
913 from an unbiased *Eomes* positive progenitor cell at different localizations along the  
914 proximo-distal axis and at different timepoints. *Mesp1* and *Foxa2* indicate the first  
915 fully specified AM and DE cells, respectively.

916

917

Figure 1

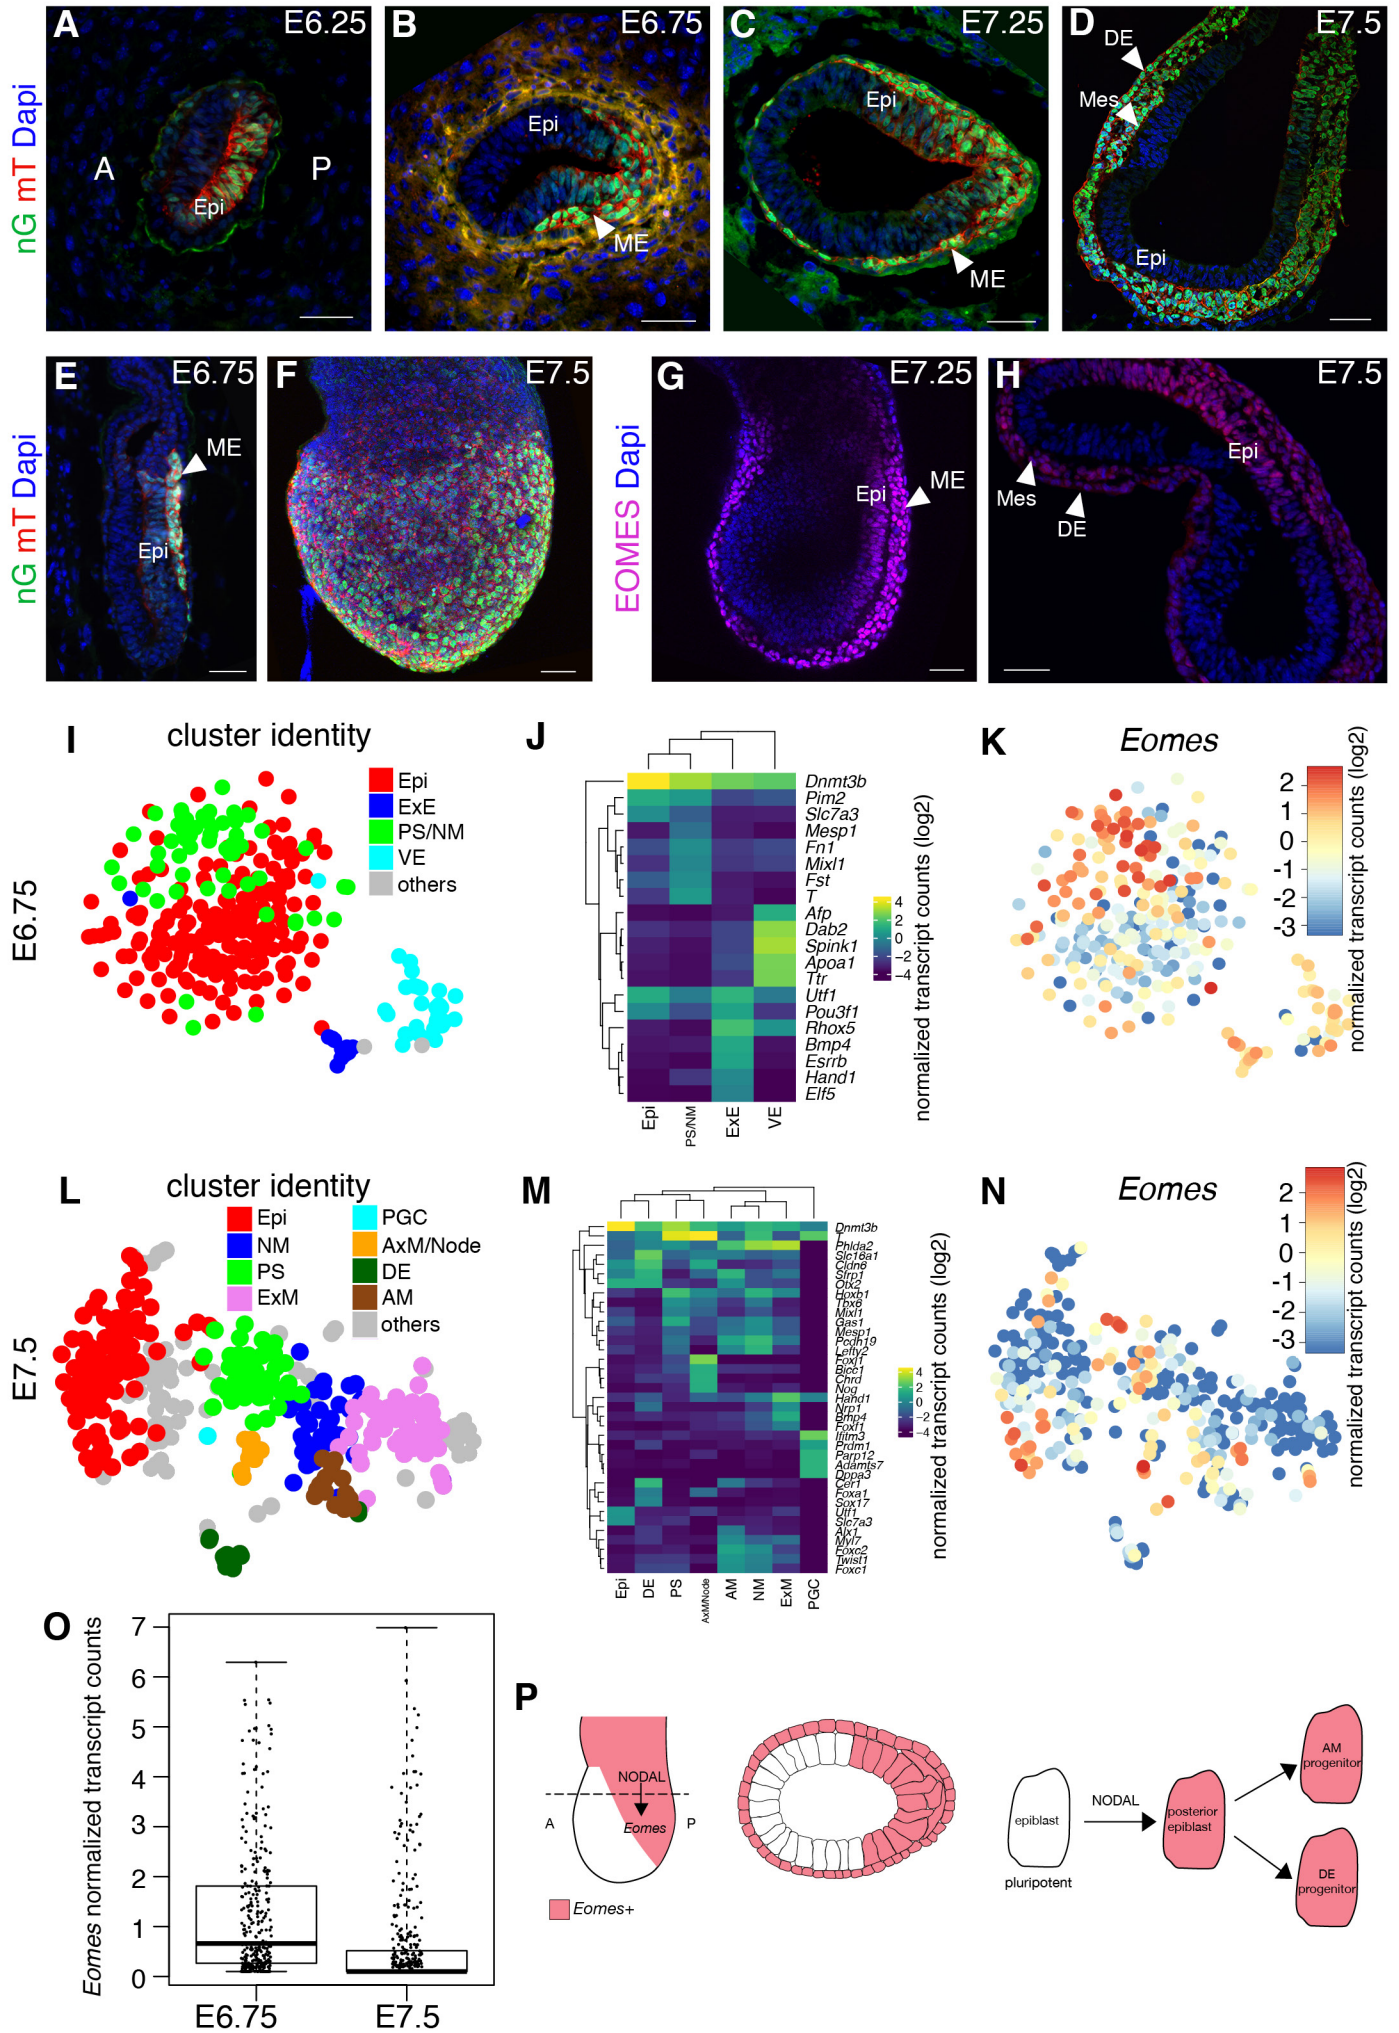

## Figure 2

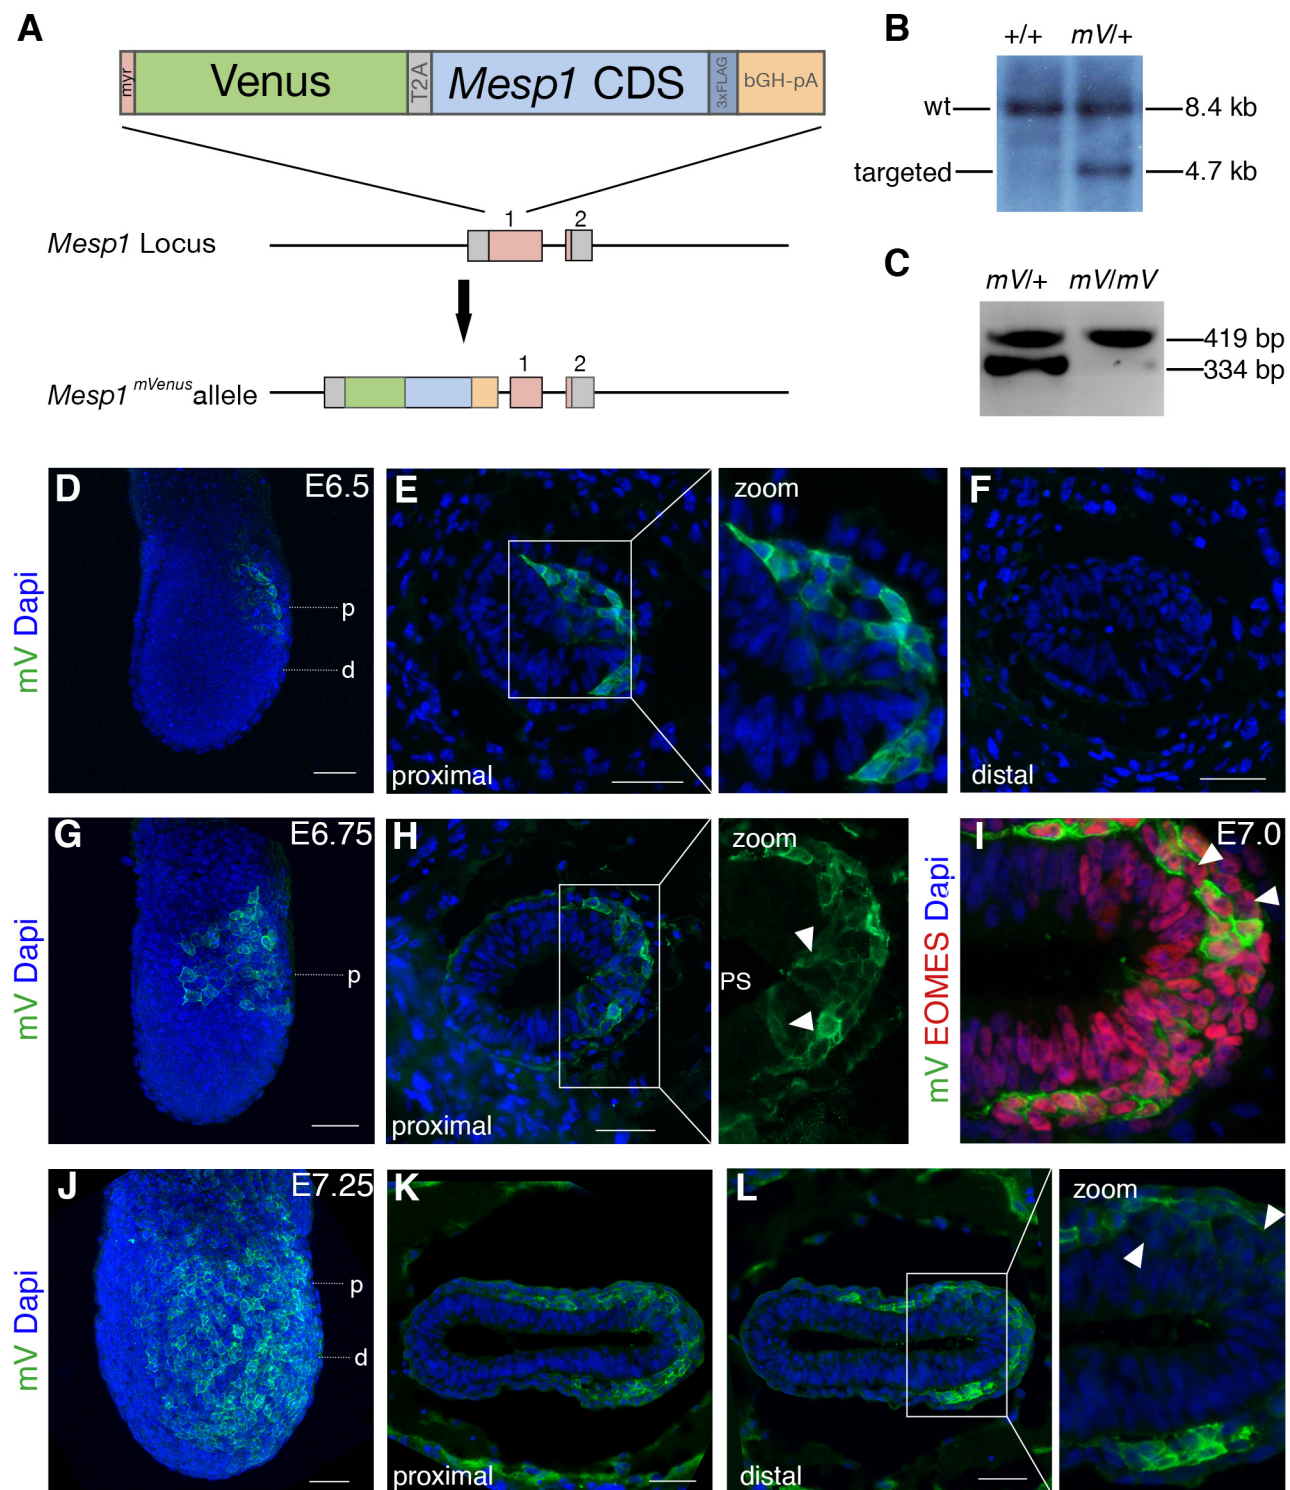

### Figure 3

mV FOXA2 Dapi

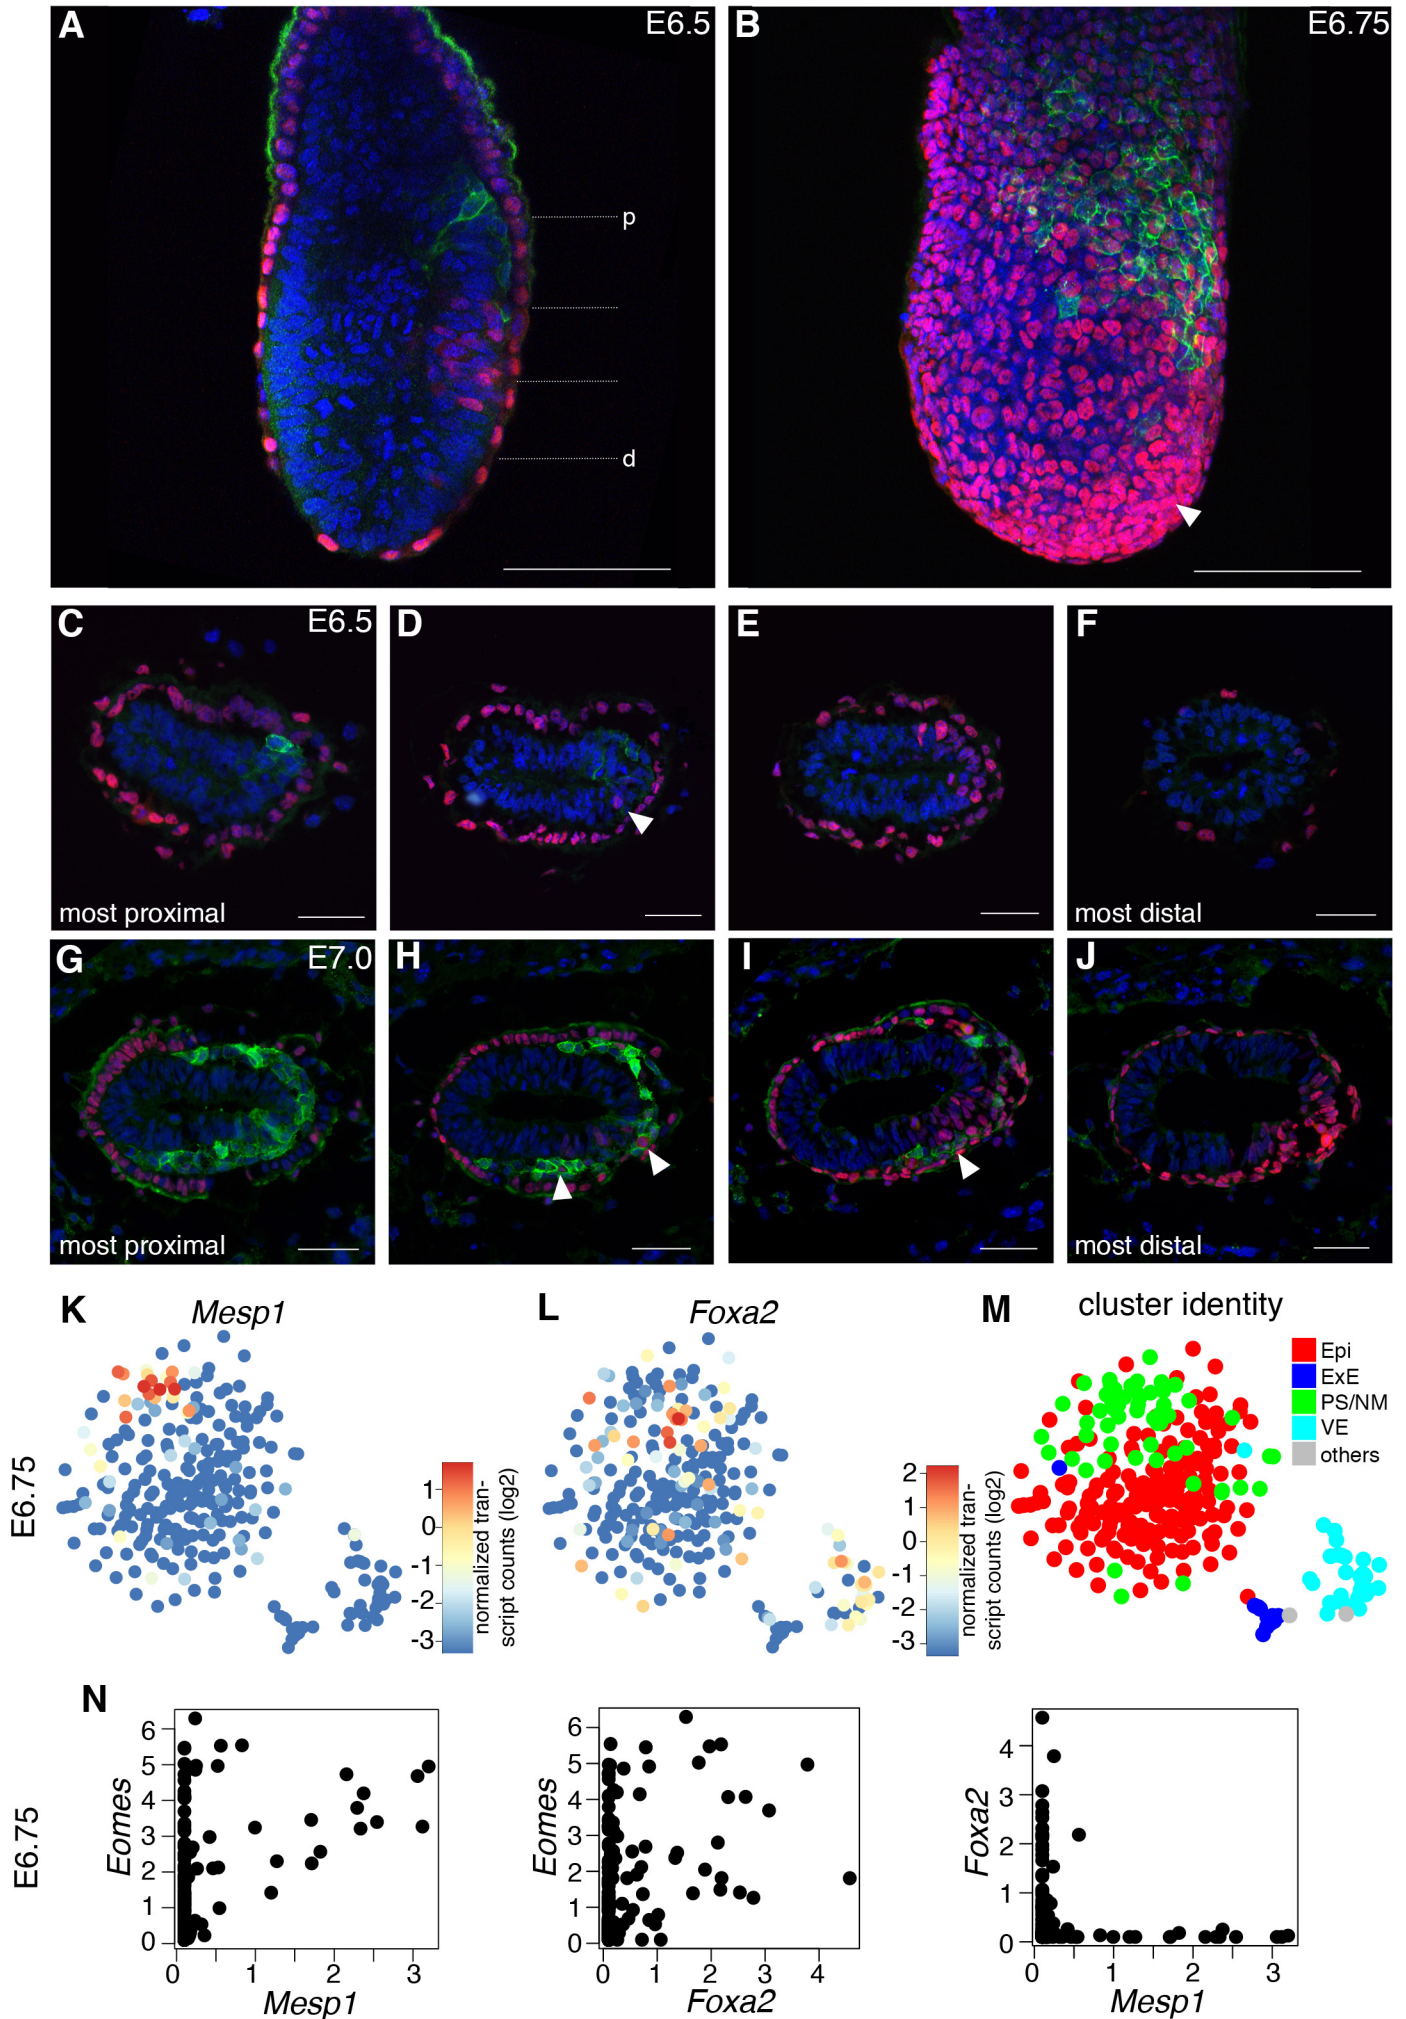



## Figure 4

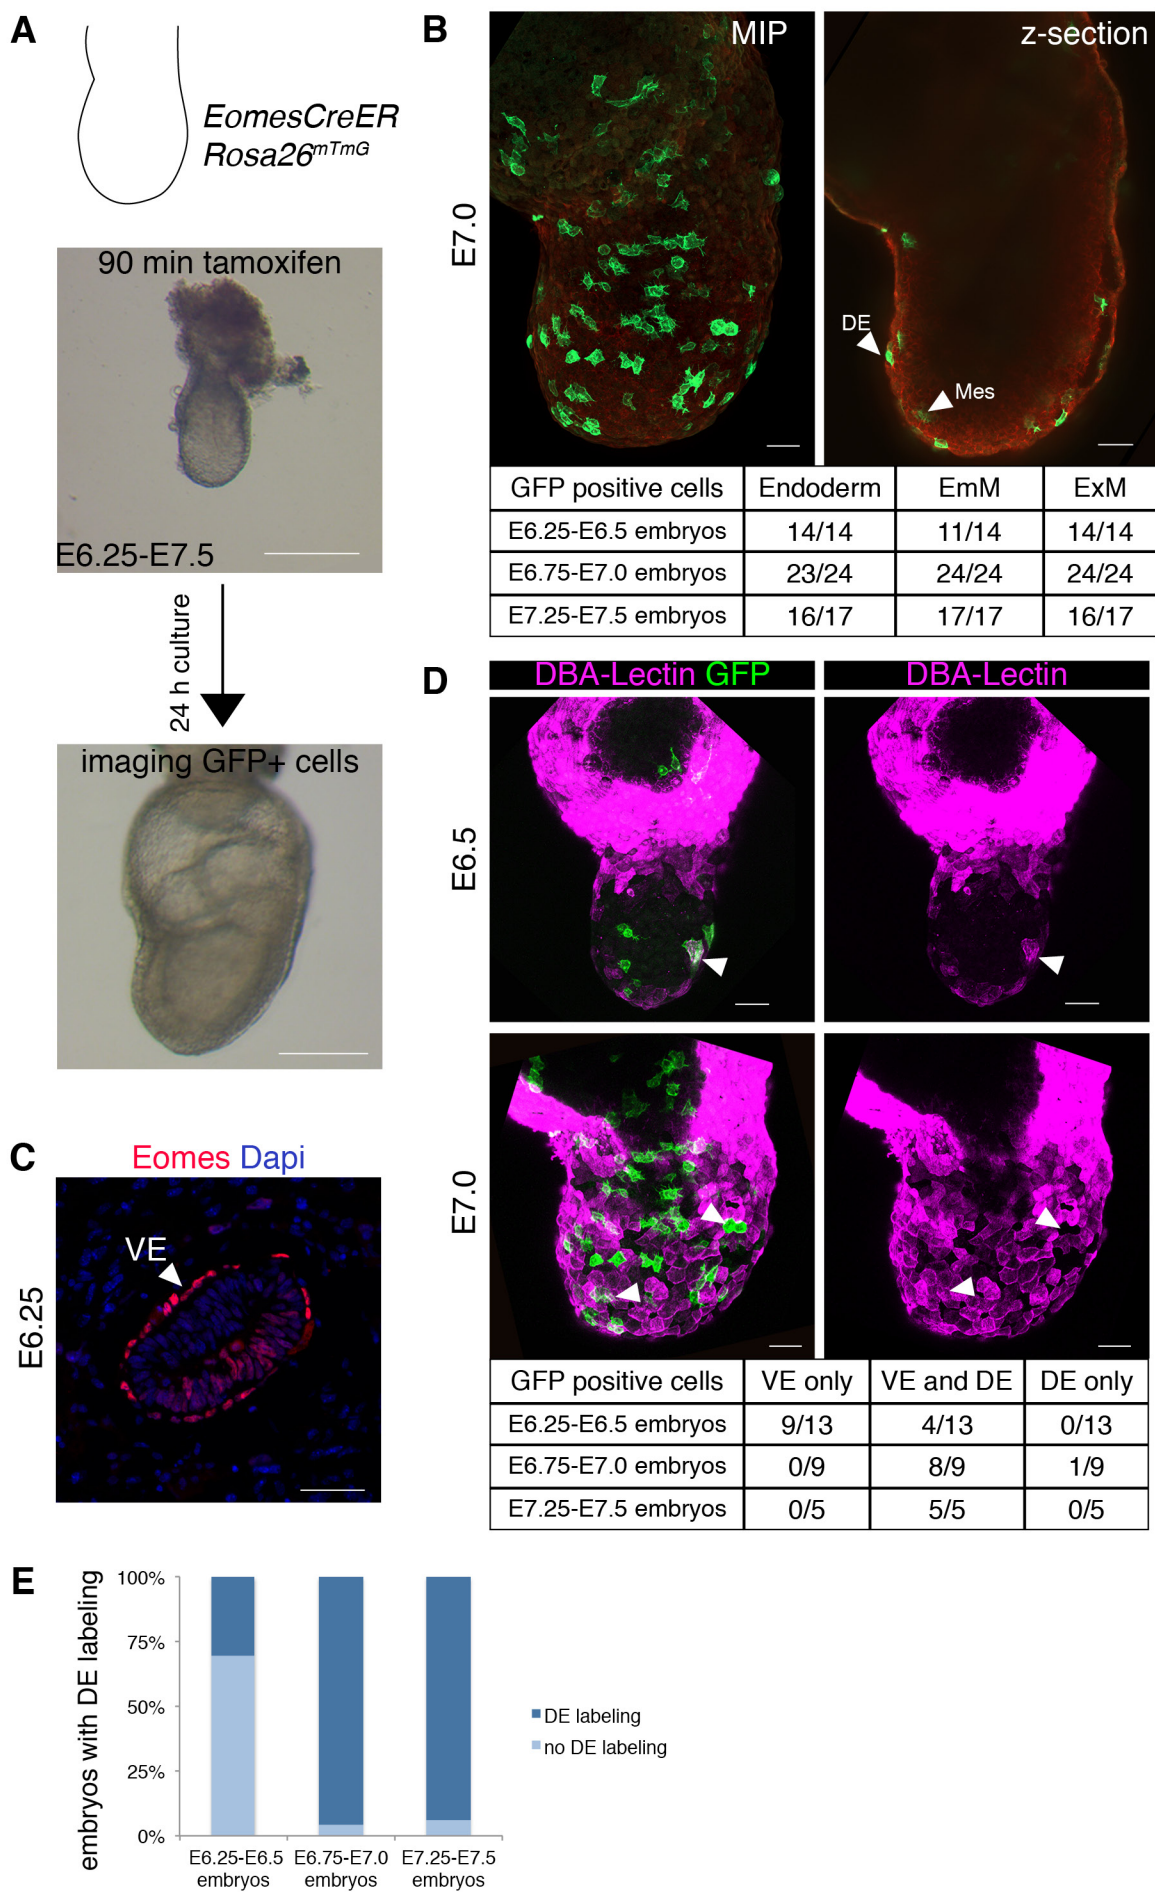

## Figure 5

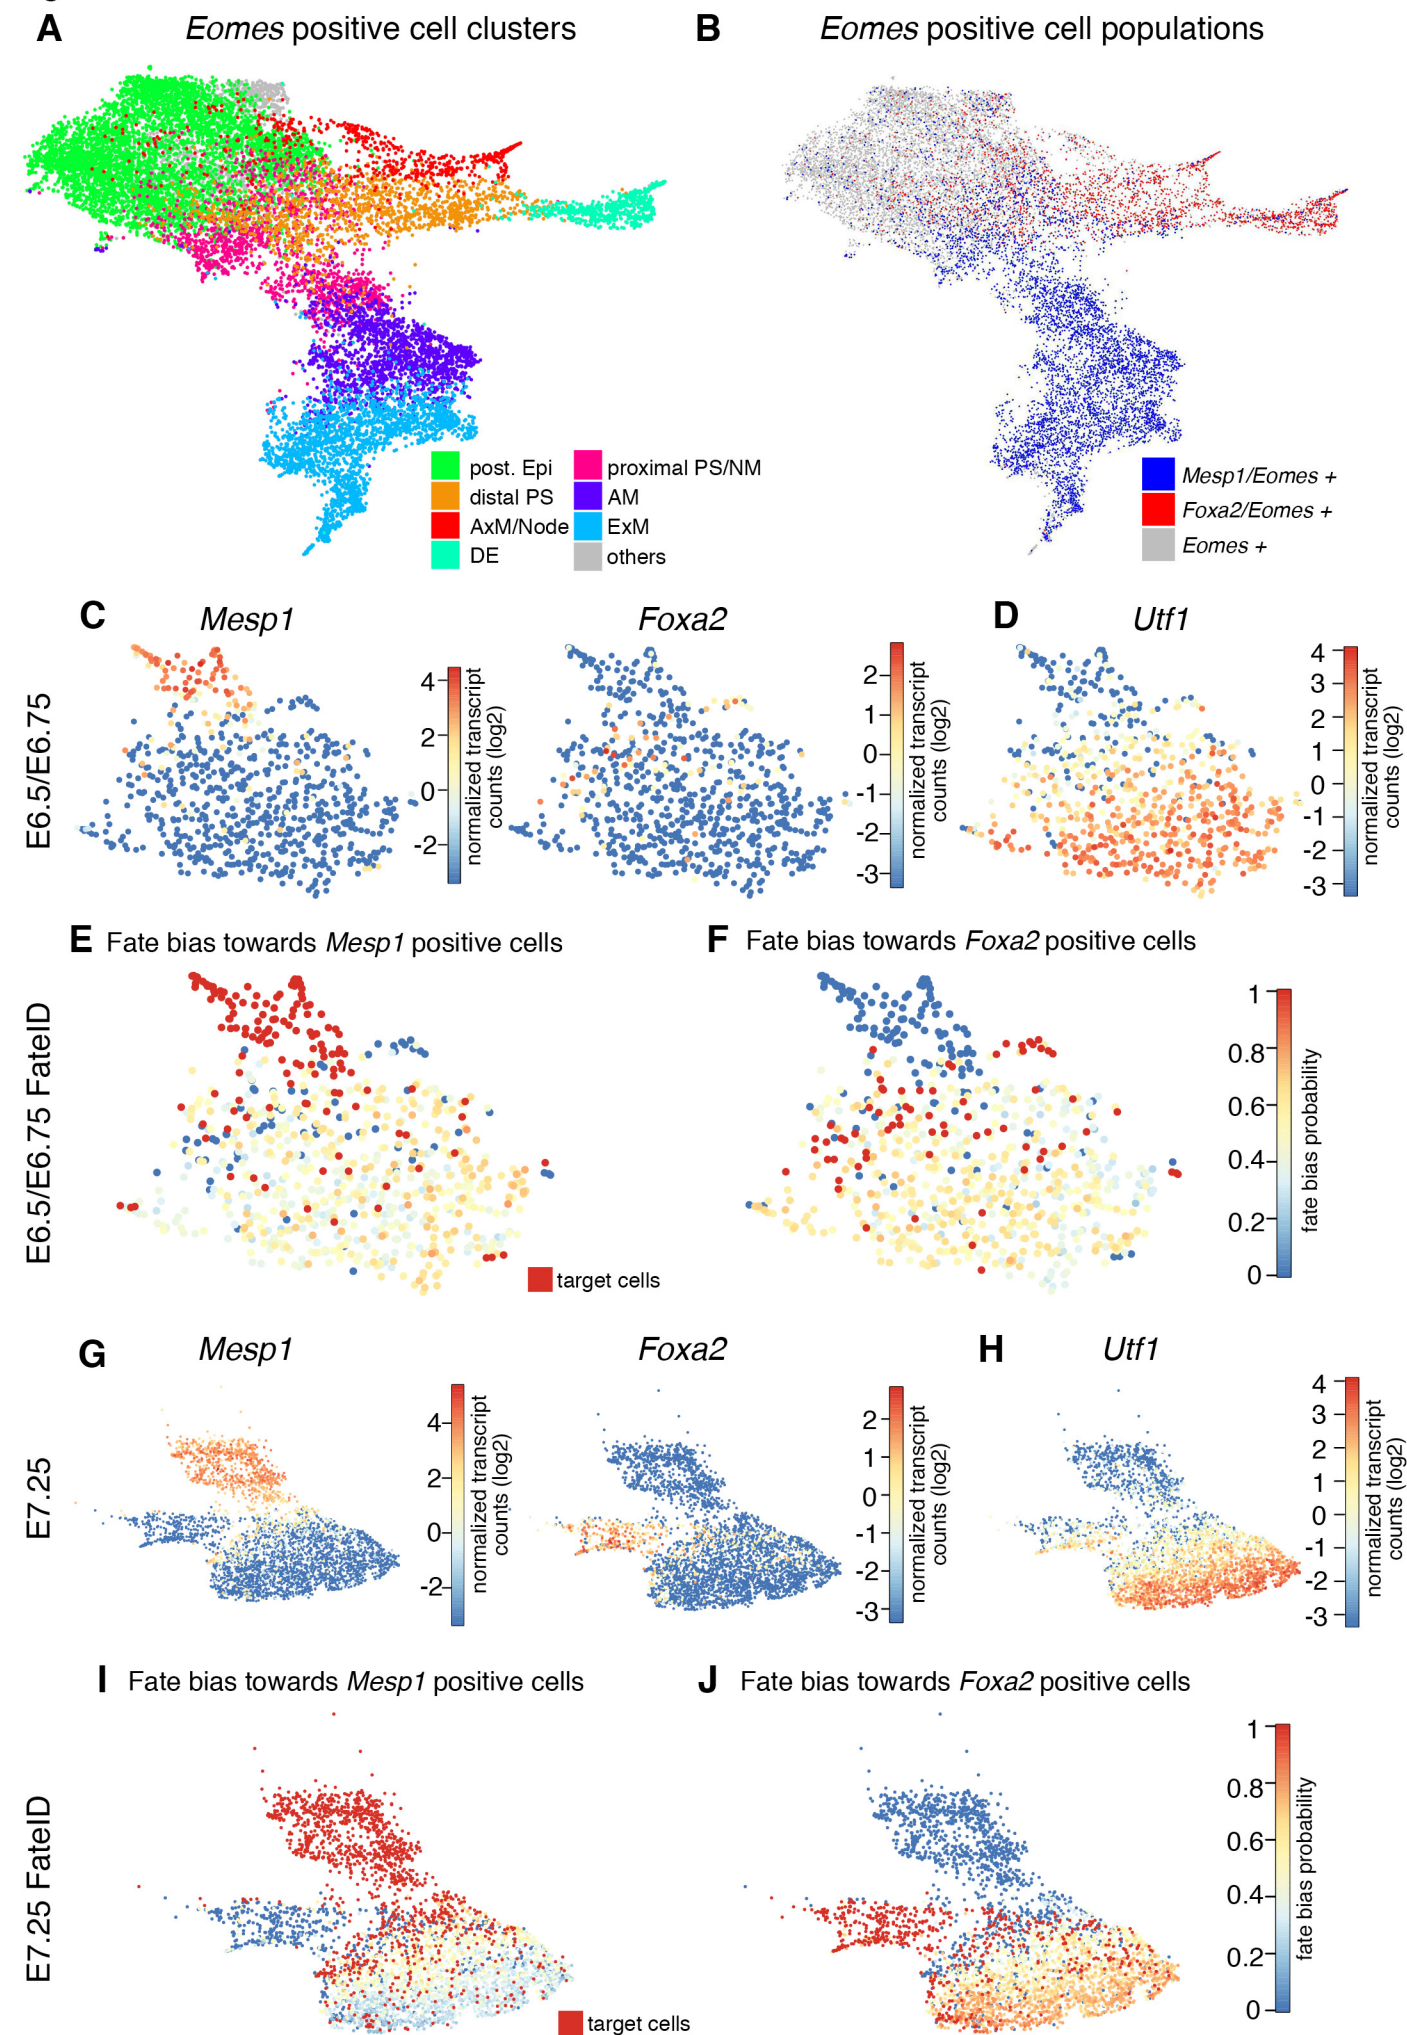

Figure 6

A

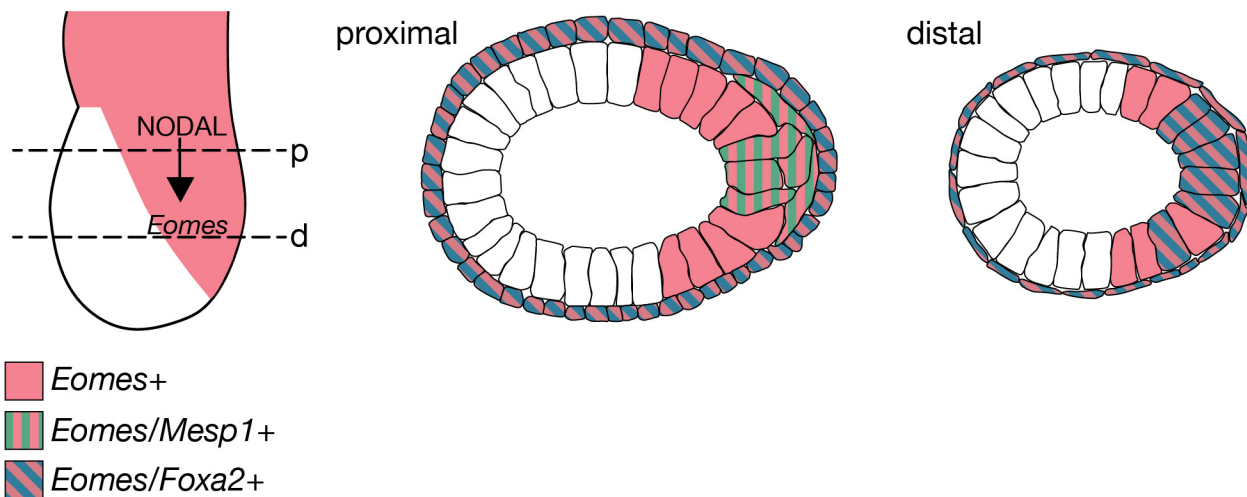

B

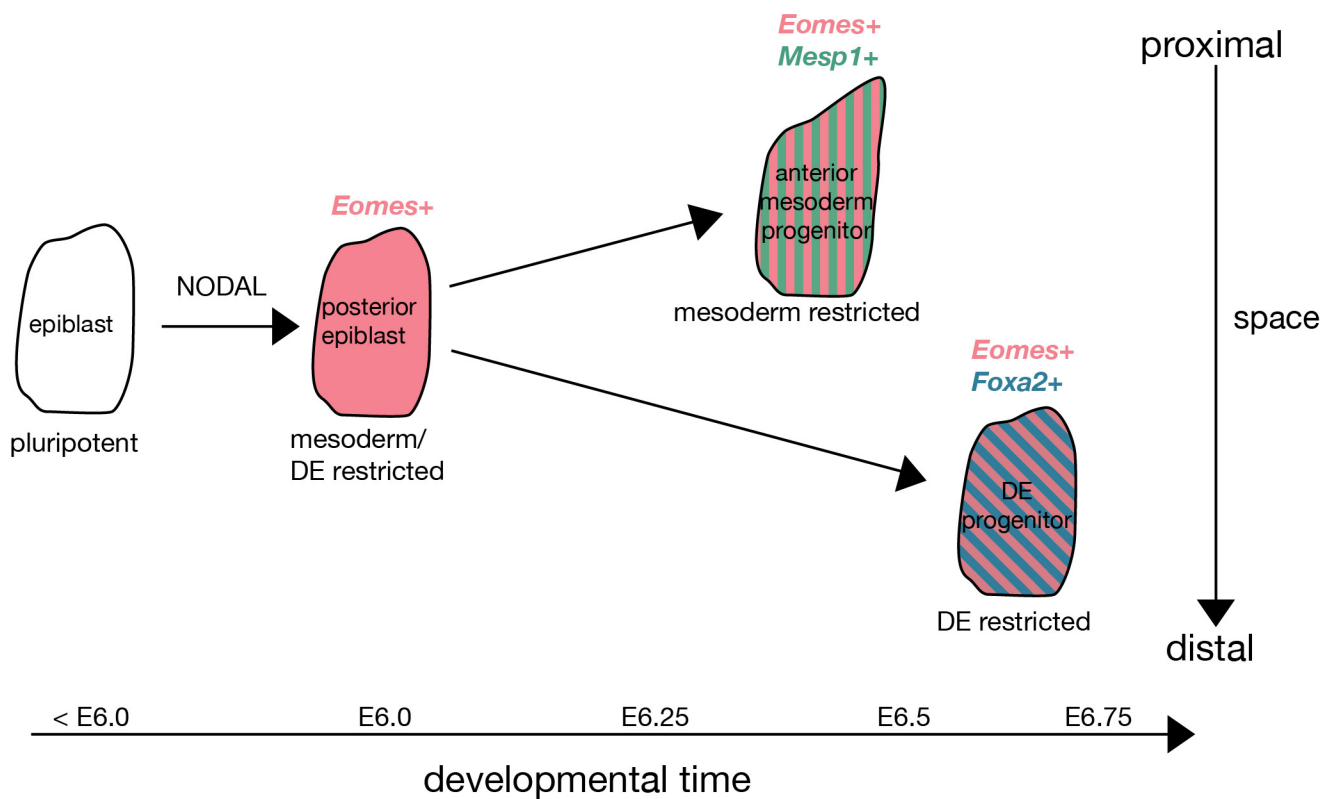

Source: https://biorxiv.org/content/10.1101/2020.06.09.142265v1.full.pdf
